# Supplementary material for: A new species of Peckoltia from the Upper Orinoco (Siluriformes, Loricariidae)
Source: Zookeys. 2016 Feb 26;(569):105–21. doi: 10.3897/zookeys.569.6630 (PMC4829682; doi:10.3897/zookeys.569.6630)
Supplement: Supplementary material 1 — Morphometrics and meristics for species of Peckoltia and Etsaputu [file zookeys-569-105-s001.xls]

## Sheet: Peckoltia SL Excel.xls
Species	Catalog #	Individual	SL	Predorsal L.	Head L.	Head-dorsal L.	Head-eye L.	Orbit Dia.	Snout L.	Internares W.	Interorbital W.	Cleithral W.	Head-pectoral L.	Thorax L.	Pectoral-spine L.	Abdominal L.	Pelvic-spine L.	Postanal L.	Anal-fin spine L.	Head Dp.	Dorsal-pectoral D.	Dorsal spine L.	Dorsal-pelvic D.	Dorsal-fin base L.	Dorsal-adipose D.	Adipose-spine L.	Adipose-up. caudal D.	Caudal peduncle Dp.	Adipose-low. caudal D.	Adipose-anal D.	Dorsal-anal D.	Pelvic-dorsal D.	Mouth L.	Mouth W.	Barbel L.	Dentary tooth cup L.	Premax. tooth cup L.	.	Median Pl.	Supramedian Pl.	Inframedian Pl.	pl. rows	Dorsal–fin rays	Pectoral–fin rays	Pelvic–fin rays	Anal–fin rays	Caudal–fin rays	caudal–fin rays	caudal–fin rays 2
Peckoltia braueri	AUM 35525	1	66.01	27.77	23.59	3.82	8.78	5.51	13.78	3.68	9.55	20.9	17	15.23	21.8	15.01	17.82	24.07	8.77	17.37	19.45	22.18	16.52	19.23	7.52	7.34	13.31	6.32	17.67	10.94	11.08	18.46	11.35	8.85	3.99	2.42	2.45		27	28	27	5	7	5	5	4	14	4	4
Peckoltia braueri	AUM 35525	2	50.56	21.35	19.03	2.35	6.72	4.88	11.07	2.74	7.94	15.71	14.34	15.02	15.95	10.73	13.11	16.15	6.36	13.21	14.66	15.26	11.77	13.32	6.86	4.93	10.83	4.4	12.64	8	8.03	10.86	8.45	7.48	3.28	1.89	1.69		29	29	28	5	7	6	5	3	14	4	4
Peckoltia braueri	AUM 35525	3	44.23	19.89	18.03	2.03	6.29	4.29	9.39	2.55	7.51	14.13	12.4	10.73	14.88	9.61	12.47	14.11	5.65	12.27	13.47	15.51	9.94	11.77	4.87	4.63	8.81	4.26	11	6.47	7	10.82	8.24	8.48	3.07	1.71	1.72		26	25	25	5	7	5	5	4	14	4	4
Peckoltia braueri	AUM 35525	4	39.78	18.43	15.92	1.6	6.02	4.24	8.56	2.63	6.79	12.05	11.47	10.59	12.91	8.78	10.49	13.26	5.1	10.69	11.83	14.17	9.03	11.22	5.12	3.97	8.08	3.59	10.28	6.85	6.96	9.11	6.92	6.78	2.69	1.6	0.91		25	25	25	5	7	6	5	4	14	4	4
Peckoltia braueri	AUM 35525	5	40.19	17.36	15.45	1.89	6.07	3.83	7.69	2.57	6.51	12.1	12.1	10.55	12.06	7.97	9.92	13.4	3.8	10.49	10.98	13.32	8.55	9.6	5.23	3.52	8.21	3.07	11.2	5.8	5.75	8.8	6.8	6.3	1.71	1.61	1.3		26	25	26	5	7	6	5	4	14	4	4
Peckoltia braueri	AUM 36228	1	88.89	38.92	32.8	6.43	12.18	6.63	19.57	4.26	15.74	28.09	23.84	20.89	29.19	20.62	24.29	28.54	13.48	22.74	25.94	32.34	24.62	27.13	14.43	8.57	12.25	11.02	18.86	18.59	15.36	24.17	16.18	15.48	4.81	4.19	4.69		25	25	26	5	7	6	5	4	14	4	4
Peckoltia braueri	AUM 36228	2	95.36	40.7	33.45	7.3	12.63	7.06	20.42	5.93	17.41	29.56	23.88	21.75	30.41	22.95	25.14	31.33	14.21	24.25	27.03	30.96	24.56	28.59	14.67	9.12	15.69	9.67	20.35	20.2	16.43	27.28	17.32	16.82	5.45	5.21	5.48		25	24	26	5	7	6	5	4	14	4	4
Peckoltia braueri	AUM 36228	3	84.05	35.79	30.36	6.2	11.39	6.4	18.31	3.99	15.24	26.69	21.31	18.91	28.02	19.26	23.87	26.37	13.73	21.76	23.54	29.84	20.56	25.35	13.92	7.59	13.17	8.99	19.51	18.01	15.25	23.67	15.37	14.76	5.05	3.62	4.49		25	25	26	5	7	6	5	4	14	4	4
Peckoltia braueri	AUM 36228	4	90.95	38.02	32.63	5.83	12.35	7.13	19.67	4.94	16.17	28.25	23.01	21.65	30.11	20.83	23.06	31.59	15.98	23.25	25.37	30.5	23.11	28.21	13.73	7.97	15.35	9.27	20	18.64	15.91	25.03	16.19	16.99	5.12	4.71	4.73		25	25	26	5	7	6	5	4	14	4	4
Peckoltia braueri	AUM 36228	5	91.69	39.31	32.86	6.07	12.59	6.63	20.66	4.48	16.03	27.76	23.21	22.82	29.62	20.85	25.59	30.35	14.68	23.7	27.45	27.85	23.52	27.36	14.74	9.08	15.37	9.09	21.32	19.43	17.38	25.22	17.09	17.38	5.67	5.01	4.96		25	26	26	5	7	6	5	4	14	4	4
Peckoltia braueri	AUM 36228	6	82.85	35.46	30.05	5.16	11.67	6.41	17.77	4.67	14.44	26.88	21.64	21.98	28.64	20.68	23.79	27.52	13.41	22.68	25.17	30.12	21.21	24.45	12.65	8.39	12.52	8.5	17.71	18.17	14.87	22.66	14.15	15.73	5.02	4.66	4.5		24	24	25	5	7	6	5	4	14	4
Peckoltia braueri	AUM 36228	7	90.7	39.66	33.14	7.57	12.07	7.08	19.78	5.04	16.15	28.43	23.11	21.16	30.11	20.55	25.38	30.77		23.48	27.08	30.94	23.12	28.74	13.8	8.48	15.08	8.97	20.73	19.11	16.11	25.13	17.13	15.26	4.66	4.39	4.13		25	24	26	5	7	6	5	4	14	4	4
Peckoltia braueri	AUM 36228	8	87.95	38.64	32.79	5.99	12.02	6.83	19.78	4.57	16.02	28.12	23.07	21.4	31.29	21.21	23.67	29.67	13.3	22.89	26.44	30.78	23.39	25.44	12.91	8.01	13.84	8.64	19.71	18.81	15.8	24.72	15.96	15.54	4.97	4.94	4.69		25	26	26	5	7	6	5	4	14	4	4
Peckoltia braueri	AUM 36228	9	92.33	39.53	33.69	6.31	12.32	7.04	20.1	5.75	16.86	29.66	23.73	21.76	31.88	22.25	24.6	30.41		24.13	27.34	31.78	23.29	28.9	12.22	8.09	15.14	9.79	20.53	18.99	16.17	25.17	16.94	16.64	4.98	5.38	5.05		25	26	25	5	7	6	5	4	14	4	4
Peckoltia braueri	AUM 36228	10	96.08	40.85	33.79	7.36	12.03	7.14	20.45	5.6	16.48	28.43	24.99	22.29	31.08	21.94	25.19	33.28	15.77	24.31	27.56	32.26	24.84	29.61	15.9	10.71	18.66	8.83	22.04	18.96	15.74	25.87	17.06	16.71	5.5	6.12	5.41		25	26	26	5	7	6	5	4	14	4	4
Peckoltia braueri	AUM 36228	11	91.12	39.91	33.14	6.63	12.52	6.66	19.88	4.7	16.96	28.16	23.31	21.37	29.65	20.75	22.98	33.1	13.44	23.41	26.48	31.05	24.67	26.4	13.49	9.15	16.41	9.26	21.95	18.42	15.6	25.04	16.51	15.72	5.43	5.57	5.41		25	24	26	5	7	6	5	4	14	4	3
Peckoltia braueri	AUM 36228	12	96.49	41.68	35.31	6.96	13.11	7.15	20.93	4.93	17.18	28.9	24.82	22.87	30.08	22.62	24.45	33.4	13.59	24.45	26.7	30.13	24.78	29.76	13.68	8.25	17.63	8.8	22.24	18.87	15.69	26.78	16.8	17.92	7.36	5.77	5.26		25	25	26	5	7	6	5	4	14	4	4
Peckoltia braueri	AUM 36228	13	91	38.44	32.81	5.77	12.08	6.47	20.34	4.66	16.22	28.17	23.36	21.85	28.86	21.21	23.57	32.05	13.6	23.46	26.17	29.57	24.37	26.91	15.07	8.75	16.17	7.85	20.85	19.15	15.65	24.52	16.47	16.63	5.8	5.28	4.98		25	25	26	5	7	6	5	4	14	4	3
Peckoltia braueri	AUM 36228	14	90.57	38.58	32.58	6.62	11.95	6.71	18.97	4.34	16.06	27.89	21.76	22.4	28.88	21.49	23.09	31.83	13.68	22.84	25.3	30.17	22.9	24.68	13.86	8.56	17.48	7.99	22.06	18.06	15.83	23.72	16.37	16.54	5.58	5.33	4.43		25	24	26	5	7	6	5	4	14	5	4
Peckoltia braueri	AUM 36228	15	86.64	37.33	31.92	5.93	11.69	6.52	18.19	4.57	15.71	26.88	22.17	20.99	29.78	21.34	24.26	28.78	14	22.2	25.02	31.31	22.36	26.91	13.93	8.48	15.6	7.22	19.72	17.88	15.2	25.06	15.24	14.32	5.28	4.81	5.14		25	25	26	5	7	6	5	4	14	4	4
Peckoltia braueri	AUM 36228	16	86.5	37.17	31.22	5.86	11.81	6.81	18.9	4.47	15.84	28.21	21.99	22.17	29.18	20.6	23.38	30.44	12.68	22.43	25.1	30.87	23.56	25.3	13.12	8.31	17.09	7.34	21.2	17.06	15.06	23.67	16.53	16.08	5.87	5.45	5.14		25	25	26	5	7	6	5	4	14	5	4
Peckoltia braueri	AUM 36228	17	86.71	37.67	31.46	7.17	11.87	6.55	18.57	4.63	15.95	27.04	21.85	20.59	29.54	19.68	23.67	29.71	12.5	21.88	25.04	31.12	23.32	26.97	11.2	8.82	17.2	7.79	21.71	17.94	14.97	23.25	15.86	16.05	5.05	5.55	4.82		25	25	26	5	7	6	5	4	14	4	4
Peckoltia braueri	AUM 36228	18	84.06	35.61	30.03	5.1	11.47	6.45	17.9	4.37	15.16	25.89	20.82	21.13	29.68	18.92	24.76	29.58	12.79	21.73	24.06	30.24	23.64	26.43	11.3	7.39	15.63	7.25	19.82	17.01	14.36	22.69	14.41	15.45	5.79	5.28	4.25		25	25	26	5	7	6	5	4	14	4	4
Peckoltia braueri	AUM 36228	19	80.56	33.3	28.23	5.41	11.09	6.11	16.2	3.74	13.68	24.45	19.35	20.28	26.03	18.92	21.2	27.76	11.29	20.5	22.84	26.74	21.15	23.77	12.09	6.98	15.77	6.78	19.63	16.32	13.36	21.25	12.65	13.89	4.36	4.64	3.97		25	25	26	5	7	6	5	4	14	4	4
Peckoltia braueri	AUM 36228	20	78.25	32.73	28.22	5.04	10.7	6.29	15.68	3.84	13.98	23.96	19.65	19.67	25.83	17.72	21.13	27.27	11.96	19.76	22.13	27.35	21.21	24.99	11.62	7.06	14.31	7.33	18.74	16.01	13.59	21.23	13.96	15.18	4.96	4.52	4.04		25	25	26	5	7	6	5	4	14	4	4
Peckoltia braueri	AUM 36228	21	79.98	33.97	28.57	5.32	11.12	6.29	16.44	4.1	14.44	24.99	19.16	20.87	25.49	18.33	21.19	27.83	12.43	20.59	23.12		21.17	24.27	12.2	8.14	14.29	6.64	18.59	16.35	13.01	21.78	12.47	12.49	4.8	3.62	4.45		25	25	26	5	7	6	5	4	14	4	4
Peckoltia braueri	AUM 36228	22	77.6	32.44	27.92	4.84	10.77	6.07	16.18	3.86	14.05	23.54	19.06	20.01	25.79	17.51	21.03	27.7	11.2	19.88	21.7	27.43	21.52	22.5	9.49	7.59	14.26	6.01	18.32	16.26	13.19	20.75	14.3	13.5	4.4	3.96	4.17		25	25	26	5	7	6	5	4	14	4	4
Peckoltia braueri	AUM 36228	23	75.92	32.79	27.7	5.95	10.69	6.04	15.87	3.89	13.85	23.22	19.02	18.26	25.74	17.53	20.27	27.17	10.49	19.48	21.42	28.6	20.15	22.04	11.52	7.13	15.33	6.32	18.62	15.03	12.48	20.63	13.17	11.78	4.45	4.02	3.76		25	25	26	5	7	6	5	4	14	4	4
Peckoltia braueri	AUM 36228	24	77.61	31.11	27.28	3.85	10.04	5.95	15.33	3.93	13.61	23.5	19.06	20.42	25.11	18.25	20.31	27.7	11.33	19.46	21.38	27.83	19.08	22.25	11.78	7.15	15.01	6.34	18.35	15.52	13.13	20.23	13.47	14.23	3.94	3.76	4.26		25	25	27	5	7	6	5	4	14	4	4
Peckoltia braueri	AUM 36228	25	76.91	33.05	28.13	4.76	10.56	5.88	16.25	4.28	13.92	23.9	19.55	19.22	25.39	17.23	21.51	26.53	11.19	19.56	21.82	27.94	20.45	23.66	10.3	7.25	14.55	6.85	18.21	15.55	13.32	20.76	14.14	14.08	4.67	3.55	3.97		26	25	26	5	7	6	5	4	14	5	4
Peckoltia braueri	AUM 36228	26	63.96	27.93	23.84	4.16	9.55	5.29	14.11	3.07	12.18	20.71	16.05	17.72	21.63	13.96	17.74	21.94	8.7	17.16	19.62	23.66	16.56	18.4	9.89	5.32	12.62	5.85	16.47	12.41	10.66	15.86	11.06	11.24	3.63	2.84	3.75		25	25	26	5	7	6	5	4	14	4	4
Peckoltia braueri	AUM 36228	27	62.33	27.17	23.46	3.86	9.16	5.17	13.02	3.04	11.4	19.3	15.72	14.79	20.26	13.55	16.75	22.22	8.43	16.26	18.34	21.13	16.44	17.54	9.65	5.07	12.61	5.35	16.01	12.37	10.54	16.26	11.55	10.52	3.44	2.93	3.53		25	25	26	5	7	6	5	4	14	4	4
Peckoltia braueri	AUM 36228	28	50.64	21.2	18.72	2.08	7.62	4.61	10.66	2.22	9.35	15.7	12.72	13.23	15.8	10.49	13.56	16.87	6.61	13.28	14.23	18.32	13.57	14.24	6.79	4.57	9.94	4.52	11.97	9.42	7.88	12.58	8.98	8.96	2.93	2.82	2.91		26	25	26	5	7	6	5	4	14	4	4
Peckoltia braueri	AUM 36228	29	46.76	20.72	18.07	2.6	7.32	4.52	10.06	1.86	9.07	14.8	11.75	12.42	14.67	11.05	12.96	15.34	6.52	12.67	14.13	17	11.73	13.26	7.81	4.23	8.72	4.15	11.74	8.51	6.91	11.46	9.13	8.02	2.94	2.77	2.46		25	25	25	5	7	6	5	4	14	4	4
Peckoltia braueri	AUM 36228	30	48.45	20.89	18.57	2.24	7.76	4.58	10.27	2.08	9.12	14.87	12.5	13.97	15.97	10.12	13.38	16.11	6.06	13	13.9	16.63	11.8	13.56	8.01	4.2	9.3	4.53	11.83	9.02	7.19	11.18	8.45	8.36	2.55	2.61	2.56		25	25	26	5	7	6	5	4	14	4	4
Peckoltia braueri	AUM 36228	31	44.79	19.66	17.21	2.39	7.03	4.66	9.58	2.38	8.68	14.21	12.26	11.35	14.7	9.66	11.85	15.82	5.7	11.78	13.36	15.72	10.88	13.33	6.51	4.42	8.39	4.09	10.97	7.91	6.51	10.09	7.45	7.97	2.78	2.3	2.43		25	25	26	5	7	6	5	4	14	4	4
Peckoltia braueri	AUM 36228	32	44.68	18.49	16.55	1.93	7.1	4.26	9.52	2.28	8.88	13.27	11.87	12.02	14.23	9.67	12.03	14.95	6.19	11.92	13.41	13.57	10.82	11.04	7.25	4.42	8.16	4.01	10.45	7.81	6.59	9.71	6.77	6.77	2.86	1.95	2.03		25	25	26	5	7	6	5	4	14		4
Peckoltia braueri	AUM 38882	1	103.88	43.92	36.72	6.92	13.11	7.33	22.57	5.42	15.38	31.08	26.76	23.4	30.03	24.72	27.81	33.72	13.2	26.97	30.02	34.02	23.9	26.98	12.81	10.8	20.95	8.58	26.03	18.16	16.96	28.37	18.62	18.76	6.15	4.9	4.76		27	27	26	5	7	6	5	4	14	4	4
Peckoltia braueri	AUM 38882	2	93.52	39.92	35.27	5.82	11.96	7.38	21.09	4.79	14.07	30.3	23.67	22.29	26.95	21.76	24.32	33.5	14.53	25.77	28.58	29.84	23.35	27.71	12.19	7.99	17.36	8.37	24.09	16.36	16.31	24.86	17.16	15.7	6.33	4.13	4.07		27	26	27	5	7	6	5	4	14	4	4
Peckoltia braueri	MZUSP 33703	1	83.63	36.02	30.6	5.48	10.87	6.54	17.96	4.42	13.54	23.84	23.09	17.85	25.49	19.39	20.48	27.65	11.89	20.61	23.12	25.78	19.51	22.22	13.66	6.48	11.86	9.93	17.42	16.61	13.89	22.89	13.93	15.45	5.72	4.23	4.75		27	26	26	5	7	6	5	4	14	5	5
Peckoltia braueri	MZUSP 34563	1	74.66	32.92	28.35	4.13	10	5.6	16.47	3.44	12.99	23.62	21.01	17.07	22.83	17	19.43	23.23	9.91	20.33	22.14	25.76	20.37	20.39	11.09	5.27	11.64	8.68	17.62	13.12	11.96	21.48	12.84	11.45	2.68	2.95	4.05		26	25	26	5	7	6	5	4	14	5	5
Peckoltia braueri	MZUSP 34563	2	80.57	34.18	28.85	5.37	10.67	5.73	17.1	3.86	13.75	25.18	22.01	19.62	25.18	18.78	20.69	27.41	10.63	20.67	23.43	27.41	20.45	21.8	12.48	7.59	13.64	9.56	18.82	15.24	13.5	22.1	14.6	13.75	5.04	3.01	3.78		27	27	27	5	7	6	5	4	14	4	4
Peckoltia braueri	MZUSP 34563	3	82.35	34.71		4.88	11.28	6.16	17.6	3.89	13.88	24.71	22.35	18.6	24.78	18.84	20.73	27.81	10.42	20.8	23.24	27.31	20.14	21.97	13.15	5.87	12.43	9.46	17.79	16.45	13.25	22.54	14.5	14.76	4.86	3.6	4.58		26	26	26	5	7	6	5	4	14	5	5
Peckoltia braueri	MZUSP 34563	4	78.49	33.43	28.99	4.6	10.76	6.02	17.28	4.17	13.42	25.41	23.03	17.28	24.71	19.17	20.71	27.11	11.28	20.96	23.28	29.36	19.81	21.93	12.55	6.89	11.66	10.55	17.88	14.62	13.76	22.72	13.36	14.08	3.91	3.66	3.96		26	25	26	5	7	6	5	4	14	5	4
Peckoltia braueri	MZUSP 34563	5	79.29	34.14	28.86	4.71	10.37	6.33	17.52	3.39	13.61	24.71	23.48	17.24	22.95	18.74	19.96	25.66	11.21	20.76	23.25	26.7	20.42	20.64	13.2	7.39	12.13	9.77	17.84	15.66	13.06	22.28	14.01	14.11	4.21	3.95	4.57		26	25	26	5	7	6	5	4	14	5	5
Peckoltia braueri	MZUSP 34652	1	62.01	25.54	23.53	3	8.54	5.24	13.68	3.02	11.15	18.64	17.72	12.6	19.68	14.1	16.8	20.97	8.17	16.65	17.35	21.14	15.14	16.84	9.74	6.05	9.98	7.33	13.98	11.75	10.42	17.23	11.28	11.76	4.16	3.29	3.67		26	26	26	5	7	6	5	4	13	6	5
Peckoltia brevis	FMNH 111511	1	92.62	40.05	32.55	7.94	12.32	6.67	19	5.65	14.93	26.88	25.45	21.07	27.14	21.57	24.58	29.47	13.46	23.23	27.3	32.37	23.76	25.42	14.2	10.2	17.1	7.76	21.42	15.72	15.63	25.43	13.61	13.27	6	3.79	3.46		24	24	24	5	7	6	5	4	14	4	4
Peckoltia brevis	INHS 36873	1	95.49	42.02	34.4	7.63	12.19	6.63	20.44	4.74	15.3	28.65	26.79	21.35	34.36	21.18	27.96	32.26	16.18	25.42	27.85	37.08	23.18	25.35	13.39	9	18.04	8.09	21.59	17.75	16.36	24.37	14.23	12.46	5.81	2.47	2.99		26	25	25	5	7	6	5	4	14	4	4
Peckoltia brevis	INHS 43344	1	105.7	45.71	38.01	7.46	14.53	6.98	22.3	6.44	17.34	32.9	27.04	25.64	34.53	23.63	28.43	34.15	17.67	28.73	32.19	38.2	26.65	28.48	15.84	10.42	20.19	10.49	25.17	18.98	19.49	27.1	17.76	15.18	4.61	3.73	3.13		25	25	25	5	7	6	5	4	14	4	4
Peckoltia brevis	INHS 43344	2	105.34	44.38	37.05	7.41	14.26	7.48	21.69	5.48	17.58	32.35	26.99	23.07	29	24.4	27.89	34.52	14.26	28.36	32.16	37.91	28.91	28.7	14.15	10.97	21.01	9.93	24.78	18.74	18.13	28.91	17.67	14.8	7.08	2.87	3.42		24	23	24	5	7	6	5	4	14	4	4
Peckoltia brevis	MNHN 1988-1084	1	92.57	40.4	32.82	8.21	12.76	5.02	19.36	4.69	12.55	28.28	26.49	19.67	30.38	20.25	25.14	32.57	14.65	23.48	27.84	33.87	23.14	26.82	15.02	8.43	14.31	11.21	19.52	19.4	15.4	26.18	13.89	12.84	5.58	4.17	3.41		24	27	26	5	7	6	5	4	14	4	4
Peckoltia brevis	MNHN19881083	1	103.02	45.38	36.84	8.49	13.4	5.7	22.26	5.8	14.34	26.1	29.25	22.44	33.03	22.71	26.78	36.62	17.09	27.48	32.04	33.34	25.58	27.06	19.54	10.47	18.22	10.65	25.44	21.15	18.14	26.47	17.74	15.72	7.74	4.28	4.55		26	24	26	5	7	6	5	4	14	5	4
Peckoltia brevis	MNHN19881083	2	65.12	28.66	24.03	5.36	9.72	4.11	14.01	3.48	9.53	17.14	17.77	13.6	22.32	13.75	16.58	21.21	8.75	16.16	19.53	22.05	15.58	15.81	11.59	6.81	12.27	7.08	14.67	12.22	10.45	15.77	10.05	9.23	3.59	3.42	2.72		26	24	26	5	7	6	5	4	14	5	4
Peckoltia brevis	MZUSP 50395	1	88.12	37.94	31.02	7.16	11.74	6.07	18.38	4.88	17.46	26.27	23.55	22.13	25.31	18.34	24.48	29.61	15.01	23.16	26.76	32.83	25.35	25.32	14.91	8.65	10.57	12.34	19.63	20.05	17.77	25.8	14.91	12.69	5.67	3.88	3.99		25	24	25	5	7	6	5	4	14	5	5
Peckoltia brevis	SIUC 29784	1	58.54	26.38	23.34	3.03	8.83	4.08	13.22	3.41	9.24	17.15	17.11	14.99	19.98	12.42	17.05	19.36		17	18.69	22.04	13.89	15.36	7.2	7.37	12.19	7.13	14.28	11.09	9.83	16.1	10.56	9.15	3.58	3.09	2.82		24	23	24	5	7	6	5	4	14	4	4
Peckoltia brevis	SIUC 29784	2	73.3	34.53	29.07	5.44	10.71	5.36	16.51	4.94	11.96	23.75	20.67	18.51	27.64	15.99	24.14	21.87	11.86	22.14	24.65	29.66	21.3	20.76	8.3	9.23	13.91	9.43	17.65	13.7	13.68	22.65	13.47	11.79	5.14	3.8	3.83		24	23	25	5	7	6	5	4	14	4	4
Peckoltia brevis	USNM 94680	1	84.08	36.43	29.95	6.98	11.47	5.52	18.33	4.71	13.3	26.27	23.85	20.41	24.35	19.32	24.14	27.7	14.53	22.49	24.96	30.4	23.53	24.02	11.37	9.85	12.4	12.51	20.22	18.61	16.25	23.94	14.06	13.06	6.06	4.05	3.87		23	23	25	5	7	6	5	4	14	4	4
Peckoltia caenosa	ANSP 166749	1	119.7	48.46	41.31	7.73	15.89	6.61	24.71	5.85	15.62	34.2	34.47	24.46	40.5	27.32	32.37	42.92	20.86	28.94	32.43	40.92	30.04	31.17	22.31	11.56	16.75	14	24.88	25.54	18.1	30.95	17.41	16.29	6.83	4.3	3.42		26	24	26	5	7	6	5	4	14	5	5
Peckoltia caenosa	ANSP 166749	2	81.98	35.25	29.55	5.96	11.43	5.45	17.09	4.12	11.11	24.02	24.46	18.66	26.37	19.07	22.4	29.28	13.3	20.95	24.27	28.18	18.6	22.19	13.64	7.33	12.54	9.32	17.52	16.19	11.99	21.36	12.92	11.82	5.78	2.45	2.86		26	25	25	5	7	8	5	4	14	5	4
Peckoltia caenosa	ANSP 166749	3	69.4	29.42	25.38	4.13	9.24	5.28	14	3.15	9.23	20.57	21.17	17.19	25.26	15.23	20.78	23.62	11.46	17.54	20.04	25.55	15.4	16.84	11.95	6.41	10.53	8.15	14.26	13.33	10.11	16.34	11.31	9.58	4.49	3.74	2.61		24	24	25	5	7	6	5	4	14	5	4
Peckoltia caenosa	ANSP 166770	1	61.3	24.85	21.3	3.73	7.84	5.09	11.95	2.42	5.92	17.42	18.11	15.81	18.96	13.81	15.83	20.37	7.31	14.18	16.26	18.53	12.38	16.54	9.41	4.99	9.87	6.22	13.47	11.03	8.1	14.74	9.83	10.8	3.13	3.41	3.38		25	25	25	5	7	6	5	4	14	5	5
Peckoltia caenosa	AUM 18946	1	156.92	60.12	48.96	11.66	18.7	7.22	29.89	8.36	21.63	41.4	37.44	33.28	54.42	36.09	33.56	59.2	25.52	35.45	40.45	47.11	34.81	41.19	30.44	12.53	28.77	16.78	34.29	34.84	22.35	39.42	21.17	19.78	12.12	6.3	5.3		26	25	26	5	7	6	5	4	13	5	5
Peckoltia caenosa	AUM 18946	2	136.77	56.32	45.95	11.41	17.65	7.01	27.18	7.52	21.18	39.53	33.75	30.5	48.04	30.31	36.96	48.81	24.66	33.28	37.59	47.45	33.38	37.64	27.7	11.86	25.02	16.1	30.25	30.71	20.83	36.42	19.64	17.09	6.47	5.91	5.28		26	25	26	5	7	6	5	4	14	5	4
Peckoltia caenosa	AUM 18946	3	106.87	43.92	37.29	6.73	14.49	6.14	21.69	7.04	16.05	30.54	27.68	23.62	40.55	24.24	31.77	39.61	19.67	26.26	29.03	40.07	26.31	28.18	19.68	9.13	18	11.95	23.32	23.56	15.65	28.12	15.86	14.71	5.39	4.67	4.06		26	25	26	5	7	6	5	4	14	5	4
Peckoltia caenosa	AUM 18946	4	93.44	38.74	33.04	5.72	13.28	5.37	18.35	5.63	14.14	27.36	23.63	22.59	33.67	20.08	26.43	33.75	14.81	22.89	25.67	32	22.61	24.05	16.47	8.52	17.5	11.22	22.5	19.54	13.81	23.24	14.45	12.94	4.43	4.13	3.88		26	25	26	5	7	6	5	4	14	5	4
Peckoltia caenosa	AUM 22836	1	134.08	53.13	45.49	8.08	17.29	6.95	26.24	7.74	19.28	36.91	33.68	27.97	46.64	29.66	37.49	49.9	25.22	31.87	35.61	55.99	31.6	35.94	25.56	12.49	23.25	13.78	28.87	30.23	19.54	34.04	19.61	17.69	8.53	5.33	5.2		25	25	26	5	7	6	5	4	14	5	4
Peckoltia caenosa	AUM 22836	2	69.37	28.92	24.83	4.23	9.77	4.16	13.33	3.88	9.93	19.71	18.07	16.51	23.81	15.13	18.83	24.85	10.34	17.38	19.13	22.75	17.02	16.71	12.77	5.87	12.79	8.56	16.02	13.52	10.64	16.78	11.55	10.59	2.9	3.26	3.19		26	25	26	5	7	6	5	4	14	5	4
Peckoltia caenosa	MCNG 24200	1	72.63	30.42	25.4	5.26	8.81	4.56	14.32	4.17	10.7	21.15	19.81	17.1	24.64	15.11	19.79	26.5	11.86	17.64	20.09	24.5	16.69	19.23	12.18	5.65	13.41	7.96	16.21	14.81	9.85	17.25	12.18	11.57	4.98	3.14	2.99		26	25	26	5	7	6	5	4	14	5	4
Peckoltia caenosa	MCNG 37452	1	123.08	49.25	41.36	8.96	15.86	5.69	23.41	6.98	16.86	34.97	30.59	26.35	41.32	29.45	30.92	47.08	18.75	28.7	32.51	37.92	28.32	33.7	23.05	10.87	22.41	14.38	28.19	27.25	17.84	33.22	18.05	15.54	8.13	5.38	5.1		26	25	26	5	7	6	5	4	14	5	4
Peckoltia caenosa	MCNG 38972	1	133.84	54.25	44.33	10.68	17.36	6.18	26.8	8.05	20.54	41.04	34.67	29.96	48.59	29.45	39.32	49.11	24.76	32.82	37.61		33.07	39.29	28.62	11.97	23.54	15.44	30.08	31.1	21.36	37.03	20.1	19.05	9.87	5.22	5.46		26	25	25	5	7	6	5	4	14	5	4
Peckoltia caenosa	MCNG 42665	1	135.06	54.19	45.14	9.43	17.52	6.79	26.5	7.3	20.28	37.89	33.76	28.33	46.18	29.68	37.01	50.84	21.77	32.18	36.61	48.28	33.36	36.34	25.87	11.98	22.66	13.14	30.28	29.74	19.94	36.06	18.73	18.23	6.13	5.28	5.15	26	26	24	26	5	7	6	5	4	14	5	4
Peckoltia caenosa	MCNG 9721	1	93.76	40.66	34.11	7.06	12.78	5.37	20.05	4.98	14.85	29.13	25.13	22.29	35.95	19.64	27.43	34.08	16.06	23.93	26.2	37.34	23.11	25.25	16.32	8.22	16.66	11.33	20.99	20.15	14.14	24.67	13.67	13.55	6.83	4.14	4.62		26	25	25	5	7	6	5	4		5	4
Peckoltia caenosa	UF 32382	1	81.24	33.63	28.87	5.04	11.26	4.72	16.37	4.54	11.77	21.22	20.03	18.15	29.09	19.03	23.71	29.91	13.43	19.86	22.93	26.42	17.76	20.28	12.1	10.2	18.5	9.22	20.7	14.63	11.79	21	12.04	10.8	4.39	3.72	3.34		26	25	26	5	7	6	5	4	14	4	4
Peckoltia caenosa	UF 32382	2	94.38	39.3	33.67	5.72	12.78	4.94	19.44	5.43	13.77	24.27	24.32	21.38	33.2	20.25	25.89	34.75	15.34	23.15	25.93	31.16	20.93	24.78	14.66	11.33	18.28	10.74	23.31	17.72	13.98	24.54	13.5	11.04	6.34	4.18	3.04		27	25	26	5	7	6	5	4	14	4	4
Peckoltia cavatica	AUM 35536	1	67.89	30.39	26.13	4.67	8.5	5.68	15.67	4.93	9.87	20.82	17.02	14.07	21.7	15	18.35	24.99	9.61	18.36	20.94	18.66	18.36	19.44	9.29	6.08	12.71	8.6	17.3	12.53	11.8	18.27	11.58	11.19	4.54	2.26	2.06		28	26	27	5	7	6	5	4	14	5	4
Peckoltia cavatica	AUM 35536	2	65.3	29.67	25.51	4.99	8.61	5.36	15.4	5	10.46	20.57	18.08	15.39	21.47	14.3	17.14	22.41	8.53	17.9	20.52	21.62	18.19	18.01	9.76	7.39	11.83	7.99	16.29	10.37	11.02	17.76	10.68	9.89	3.63	2.63	2.12		28	29	27	5	7	6	5	4	14	4	4
Peckoltia cavatica	AUM 35536	3	65.06	30.34	25.94	4.55	9.35	5.96	15.33	4.98	10.72	20.75	18.16	14.47	21.97	14.5	18.48	21.75	8.6	17.94	20.45	22.04	19.38	18.36	7.38	7.25	11.92	7.23	16.03	10.24	10.85	18.47	10	9.93	3.82	1.71	2.1		26	25	26	5	7	6	5	4	14	4	4
Peckoltia cavatica	AUM 35536	4	60.9	27.25	23.4	4.2	7.82	5.15	13.76	4.87	10	18.37	16.08	13.76	20.39	14.14	16.54	22.33	8.74	15.89	18.65	19.22	14.6	16.3	8.01	6.99	13.29	6.4	16.63	9.82	10.5	14.98	10.71	8.46	3.43	1.68	2.2		26	26	27	5	7	6	5	4	14	4	4
Peckoltia cavatica	AUM 35536	5	55.81	26.03	22.17	3.89	7.69	4.91	12.64	4.31	9	17.67	15.34	13.64	18.26	12.89	14.8	18.56	7.04	15.71	18.09	19.62	12.97	15.49	5.64	6.14	11.43	6.31	14.97	8.47	9.08	14.6	9.24	8.94	2.34	1.84	1.58		26	25	25	5	7	6	5	4	14	4	4
Peckoltia cavatica	AUM 35536	6	60.36	28.08	24.04	4.51	8.37	5.61	14.1	4.3	10.24	19.1	16.58	13.19	20.15	13.54	16.84	21.34	8.15	16.63	18.62	21.33	14.59	17.48	7.54	6.72	13.04	6.7	16.61	10.34	9.72	15.32	10.51	9.88	3.63		1.63		26	26	25	5	7	6	5	4	14	4	4
Peckoltia cavatica	AUM 35536	7	41.96	19.07	16.37	2.89	5.96	3.6	8.72	3.12	6.55	12.58	11.3	10.25	13.59	10.34	11.87	14.57	4.83	11.35	13.23	14.16	9.69	12.87	5.97	5.12	7.35	5.09	10.83	6.56	6.95	10.94	6.87	6.31	2.33	1.52	1.1		25	25	25	5	7	6	5	4	14	4	4
Peckoltia cavatica	AUM 35536	8	41.4	18.14	16.21	1.62	6	3.32	8.81	2.97	6.3	12.02	12.98	10.85	13.37	7.44	11.1	13.82	4.54	11.2	12.24	15.27	9.04	10.85	4.36	4.93	8.95	3.79	11.49	6.83	6.26	8.32	6.38	6.13	1.97	1.13	1.08		26	27	26	5	7	6	5	4	14	4	4
Peckoltia cavatica	AUM 35536	9	38.54	17.92	15.59	2.36	5.84	3.27	8.56	2.85	6	11.49	10.97	8.96	10.99	8.76	10.12	13.13	4.39	10.58	12.29	12.66	9.43	9.68	5.3	4.4	8.66	3.26	10.28	5.94	5.99	8.53	6.87	5.67	2.87	1.2	0.85		25	26	25	5	7	6	5	4	14	4	4
Peckoltia cavatica	AUM 35536	10	38.1	16.53	15.23	1.81	5.48	3.43	7.98	2.73	5.8	10.69	11	9.57	11.2	6.77	10.06	12.85	3.62	10.11	11.14	13.01	8.8	9.98	3.86	4.22	7.68	3.36	10.04	5.67	6.42	8.23	6.13	6.66	2.04	0.98	0.93		26	25	25	5	7	5	5	4	14	4	4
Peckoltia cavatica	AUM 36229	1	71.75	31.97	27	5.11	9.25	6.04	15.5	4.62	11.59	21.38	20.42	15.87	23.68	15.8	19.01	25.74	8.81	18.38	20.22	26.69	18.07	19.06	7.83	8	14.9	8.45	19.46	12.96	12.36	19.12	12.52	11.81	4.8	3.09	2.09		26	28	26	5	7	6	5	4	14	4	4
Peckoltia cavatica	AUM 36229	2	58.17	26.08	22.2	4.17	7.57	4.98	12.2	4.22	9.14	17.51	16.8	14.19	19.78	13.42	16.86	19.56	7.93	15.78	17.1	22.38	14.96	15.48	7.65	6.1	12.61	6.71	14.78	10.31	10.61	14.8	9.91	8.66	3.1	2.28	1.73		26	27	27	5	7	6	5	4	14	4	4
Peckoltia cavatica	AUM 36229	3	55.06	25.08	21.64	3.45	7.44	4.85	12.83	3.55	8.21	17.29	15.04	12.5	18.42	11.92	14.58	19.01	7.01	15.53	17.46	19.62	13.77	16.5	7	6.66	11.68	5.94	14.01	9.35	10.08	15.7	9.77	9.49	3.8	1.7	1.91		26	25	25	5	7	6	5	4	14	4	4
Peckoltia cavatica	AUM 36229	4	53.1	23.83	21.23	3.23	7.76	4.79	12.02	2.98	8.4	17.17	15.09	12.51	18.31	12.3	15.31	19.06	7.24	14.99	16.82	18.85	12.85	14.26	6.51	6.36	11.15	5.7	14.6	8.84	9.01	12.56	9.87	8.64	3.33	1.74	1.77		26	26	25	5	7	6	5	4	14	4	4
Peckoltia cavatica	AUM 36229	5	52.82	24.32	21.14	3.56	7.76	4.52	12.58	3.28	8.69	16.67	14.79	11.61	17.43	11.7	14.07	18.5	6.63	14.93	16.61	17.97	12.29	14.58	6.1	5.07	11.64	5.62	14.63	8.82	8.57	14.41	8.94	8.21	3.3	2.13	1.83		26	26	26	5	7	6	5	4	14	4	4
Peckoltia cavatica	AUM 36229	6	49.02	22.69	19.52	3.23	7.22	4.49	10.54	3.46	8.41	15.4	13.62	11.76	15.71	11.02	13.04	16.65	5.6	13.9	15.86	17.85	12.05	13.95	6.42	6.08	9.94	4.59	12.42	9.29	8.68	11.62	8.47	8.24	3.54	1.24	1.71		25	26	25	5	7	6	5	4	14	4	4
Peckoltia cavatica	AUM 36229	7	44.07	19.39	16.78	2.2	6.68	3.72	9.52	2.57	7.09	13.21	12.38	11.31	13.84	8.55	12.33	15.39	5.73	11.99	13.45	16.26	9.74	12.9	5.82	4.57	9.02	4.54	12.43	6.04	7.28	10.37	7.18	7.56	2.62	1.73	1.76		27	26	26	5	7	6	5	4	14	4	4
Peckoltia cavatica	AUM 36229	8	43.41	18.9	16.71	2.12	6.76	3.62	8.99	2.42	6.93	13.27	12.72	10.39	13.36	9.55	11.9	16.03	5.73	11.62	13.06	15.14	10.09	11.63	5.55	4.67	8.25	3.87	11.78	6.23	6.59	10.04	8.46	7.61	2.86	1.67	1.07		28	27	27	5	7	6	5	4	14	4	4
Peckoltia cavatica	AUM 36229	9	37.08	17.01	15.03	1.7	5.59	3.4	8.22	1.86	5.75	11.12	11.04	8.92	11.68	8.2	9.8	12.14	4.64	10.21	11.5	12.97	8.38	8.78	4.29	3.58	7.22	3.27	9.6	6.07	6.18	8.35	6.14	6.26	2.05	1.17	1.21		27	28	27	5	7	6	5	4	14	4	4
Peckoltia cavatica	AUM 36229	11	38.59	17.17	15.35	1.81	5.95	3.59	7.81	1.95	5.56	11.2	11.18	9.76	11.09	7.72	9.74	13.44	4.43	10.55	11.44	11.98	7.18	9.58	4.98	3.6	8.65	3.63	10.58	6.09	5.72	7.28	6.46	6.29	2.11	1.2	1.21		26	26	27	5	7	6	5	4	14	4	4
Peckoltia cavatica	AUM 36229	12	36.56	16.95	15.02	2.17	5.57	3.39	7.72	2.21	5.57	11.16	10.85	8.28	11.32	7.51	9.62	12.02	5.26	9.87	11.32	8.42	8.52	9.38	4.69	3.69	7.02	3.09	9.6	5.25	5.45	8.38	6.2	5.94	2.75	1.04	1.2		26	26	26	5	7	6	5	4	14	4	4
Peckoltia cavatica	AUM 36229	13	35.82	16.33	16.55	2.21	5.65	3.41	7.57	1.98	5.24	11.08	10.56	8.43	10.79	8.11	8.65	11.2	4.9	10.23	11.17	11.01	7.46	8.99	4.07	3.41	7.53	3.49	10.2	5.48	4.89	8.43	6.33	5.65	1.85	0.89	1.71		25	25	26	5	7	6	5	4	14	4	4
Peckoltia cavatica	AUM 36229	14	36.59	16.08	14.97	1.98	6.29	3.39	7.45	1.95	5.94	11.23	9.94	8.89	11.54	9	10.05	11.8	4.35	9.68	11.07	11.8	7.47	9.92	5.13	4.59	6.72	2.89	9.62	5.96	5.92	8.49	6.24	6.64	1.57	1.01	1.25		26	26	26	5	7	6	5	4	14	4	4
Peckoltia cavatica	AUM 36229	10	38.92	17.98	15.96	2.53	5.53	3.79	8.3	2	5.87	11.05	11.22	9.43	10.52	8.76	9.99	13.68	4.58	10.51	12.05	10.27	8.45	9.96	4.54	3.92	8.64	3.85	9.57	6.08	5.94	8.62	7.18	6.37	2.27	1.53	1.27		26	26	26	5	7	6	5	4	14	4	4
Peckoltia cavatica	USNM 372572	1	69.98	31.96	27.43	4.88	9.26	5.95	15.67	5.27	11.39	22.3	21.27	16.81	24.17	15.57	19.75	23.59	10.25	19.36	21.77	24.01	17.87	18.7	7.97	7.75	14.03	9.45	17.22	12.02	11.8	17.94	11.71	10.55	4.88	2.19	2.35		28	27	26	5	7	5	5	4	14	4	4
Peckoltia ephippiatus	MCP 35627	1	101.67	41.47	32.63	9.89	10.66	6.8	19.97	4.82	16.66	27.39	24.67	23.1	29.28	22.02	25.73	36.36	16.21	22.11	27.09	33.48	22.07	28.52	15.16	11.59	16.46	12.4	24.95	20.39	15.4	25.54	15.08	17.33	3.58	6.54	6.25	.	26	24	26		7	6	5	4	14	5	5
Peckoltia ephippiatus	MCP 35627	1	101.67	41.47	32.63	9.89	10.66	6.8	19.97	4.82	16.66	27.39	24.67	23.1	29.28	22.02	25.73	36.36	16.21	22.11	27.09	33.48	22.07	28.52	15.16	11.59	16.46	12.4	24.95	20.39	15.4	25.54	15.08	17.33	3.58	6.54	6.25	.	26	24	26		7	6	5	4	14	5	5
Peckoltia ephippiatus	MCP 35627	2	96.43	39.97	31.68	8.9	10.28	6.46	18.58	3.56	16.35	26.81	22.06	21.46	29.5	21.32	23.73	34.17	15.38	21.94	26.16	32.07	21.94	26.5	14.15	10.6	15.34	11.93	22.89	18.62	14.4	24.47	14.27	16.82	4.05	6.41	6.15	.	26	24	26		7	6	5	4	14	5	5
Peckoltia ephippiatus	MCP 35627	3	97.67	39.81	31.77	8.7	10.81	7.05	18.88	4.29	15.98	26.75	23.01	21.8	31.28	21.72	23.91	35.68	14.26	21.42	25.5	31.69	21.08	27.63	14.85	11.9	17.35	11.74	23.74	18.56	13.71	23.57	14.58	16.69	4.11	6.08	5.71	.	26	24	26		7	6	5	4	14	5	5
Peckoltia ephippiatus	MCP 35627	4	92.52	37.66	30.37	7.79	10.49	6.61	17.4	4.34	15.75	25.45	22.35	21.26	28.97	21.7	23.71	33.47	15.08	20.68	24.38	30.98	20.34	23.33	12.8	10.8	16.73	11.42	23.25	17.63	13.67	22.35	14.68	15.83	3.51	5.77	6.26	.	26	24	26		7	6	5	4	14	5	5
Peckoltia ephippiatus	MCP 35627	5	89.66	37.07	28.7	7.65	10.2	6.96	17.71	4.87	15.02	25.74	21.49	20.61	29.13	20.68	27.3	32.55	13.75	20.72	24.48	30.37	18.71	22.77	14.6	10.95	15.58	12.28	23.44	16	13.22	22.04	13.88	15.03	3.38	5.98	6.47	.	25	24	26		7	6	5	4	14	5	5
Peckoltia ephippiatus	MCP 35627	6	85.02	34.37	27.98	7	10.67	6.28	15.86	3.74	15.18	23.73	20.11	19.54	24.02	18.31	19.8	29.55	12	19.36	23.01	26.43	20.15	23.09	12.8	10.74	15.46	10.22	20.57	15.85	12.64	21.81	12.96	14.42	3.29	5.08	4.99	.	26	24	26		7	6	5	4	14	5	5
Peckoltia ephippiatus	MCP 35627	7	82.63	33.96	26.33	6.99	8.86	6.3	15.48	4.31	13.1	23.24	19.84	19.7	26.47	18.03	21.13	30.65	11.68	19.01	22.47	26.5	16.75	21.86	13.94	9.87	14.04	10.36	20.23	15.63	12.18	20.25	11.38	13.18	3.08	5.71	5.94	.	26	25	26		7	6	5	4	14	5	5
Peckoltia ephippiatus	MCP 35627	8	80.84	34.62	27.55	7.65	8.4	6.92	15.85	4.33	12.37	22.98	19.68	19.62	25.52	17.67	19.63	27.75	11.67	19.52	23.73	28.21	18.07	22.92	10.38	10.08	13.94	11.42	21.88	13.11	11.37	20.18	12.62	13.92	3.63	5.02	4.75	.	26	24	26		7	6	5	4	14	5	5
Peckoltia ephippiatus	MCP 35627	10	80.15	33	26.66	6.84	10.28	5.47	14.98	4.18	14.43	22.57	18.9	19.59	25.99	17.43		28.63	12.46	18.4	21.66	27.17	19.01	22.06	11.76	9.47	13.71	10.03	19.97	14.61	11.56	20.33	11.72	12.38	3.74	4.74	4.72	.	26	25	26		7	6	5	4	14	5	5
Peckoltia ephippiatus	MCP 35627	11	77.15	33.79	26.38	7.12	8.48	5.75	15.84	4.49	13.52	22.1	19.52	17.41	23.56	17.64	18.6	27.77	13.01	18.75	22.64	25.8	17.4	21.1	10.37	9.53	12.39	11.39	20.21	13.95	12.02	20.46	12.46	13.38	3.41	5.34	5.68	.	25	24	25		7	6	5	4	14	5	5
Peckoltia ephippiatus	MCP 35627	12	77.75	31.79	25.71	6.55	10.02	5.79	14.96	3.23	14.45	21.68	18.56	18.51	24.72	16.65	18.86	27.64		17.53	20.96		17.29	20.98	9.84	9.54	15.09	9.59	20.45	14.09	11.17	18.84	11.29	12.16	3.06	3.87	4.75	.	26	24	26		7	6	5	4	14	5	5
Peckoltia ephippiatus	MCP 35627	13	73.26	33.16	27.31	7.32	8.56	5.78	15.02	4.28	12.85	21.4	18.21	17.3	22.82	17.2	19.54	25.79	10.4	18.05	21.18	21.85	17.39	20.15	9.86	8.81	13.33	10.13	20	13.48	11.49	17	11.2	12.72	2.3	5.52	5.06	.	26	25	26		7	6	5	4	14	5	5
Peckoltia ephippiatus	MCP 35627	14	72.69	31.16	24.79	6.17	8.18	6.07	13.82	4.33	13.04	21.97	18.75	17.84	23.78	15.52	18.58	25.85	10.34	17.22	20.68	25.36	16.39	18.61	10.31	8.68	12.8	9.82	18.36	12.88	11.06	17.43	11.25	12.75	1.96	4.6	5.06	.	26	24	26		7	6	5	4	14	5	5
Peckoltia ephippiatus	MCP 35627	15	72.02	30.02	24.29	6.68	8.41	5.17	13.76	4.04	11.77	20.2	18.01	16.74	22.99	17.29	21	26.8	10.01	16.5	19.44	24.23	15.9	19.92	10.28	9.16	12.65	10.01	19.32	13.06	10.89	18.18	10.36	11.75	2.42	4.42	4.34	.	26	24	26		7	6	5	4	14	5	5
Peckoltia ephippiatus	MCP 35627	16	68.76	29.63	24	6.26	7.47	5.88	13.07	4.13	11.69	20.24	17.01	16.1	20.89	14.98	18.19	25.99	10.25	16.5	19.76	22.33	15.63	20.69	8.12	7.61	10.77	9.14	18.45	12.73	10.4	16.3	10.96	11.61	2.33	4.84	5	.	25	24	26		7	6	5	4	14	5	5
Peckoltia ephippiatus	MCP 35627	17	66.03	28.21	22.6	5.15	8.15	5.28	12.36	4.1	11.09	18.76	16.05	15.3	21.67	14.69	17.78	24.47	8.97	15.45	18.36		13.63	17.66	9.8	7.82	12.58	8.82	18.67	11.82	9.96	15.68	10.52	11.15	2.97	3.74	4.13	.	26	24	26		7	6	5	4	14	5	5
Peckoltia ephippiatus	MCP 35627	18	64.14	28	22.17	5	8.2	5.22	12.77	4.3	11.93	19.17	16.61	16.16	20.47	13.62	17.22	24.24	9.26	15.47	18.63	21.17	15.78	18.06	7.83	8.4	12.65	9.13	17.41	12.4	9.35	16.21	10.55	11.38	2.29	5.1	4.39	.	26	24	26		7	6	5	4	14	5	5
Peckoltia ephippiatus	MCP 35627	19	60.43	25.62	22.13	4.31	7.8	4.95	12.96	3.45	9.68	18.06	16.6	15.18	19.45	14.18	16.37	20.96	7.1	15.33	17.99		14.11	16.66	10.01	5.32	9.64	7.75	14.03	11.2	9.04	16.11	10.31	10.77	2.87	3.86	4.3	.	26	24	26	5	7	6	5	4	14	6	4
Peckoltia ephippiatus	MCP 35627	20	55.6	24.17	19.3	4.92	6.91	4.49	11.07	2.92	9.8	15.57	14.13	12.37	17.74	12.29	13.41	19.94		12.68	14.54	17.42	12.47	14.86	7.9	5.13	9.84	7.21	12.81	11.39	8.19	14.07	9.3	8.46	1.97	3.76	3.88	.	26	26	26	5	7	6	5	4	14	5	4
Peckoltia ephippiatus	MCP 35627	22	48.2	20.35	16.36	4.55	6.32	3.76	9.25	2.3	7.95	13.17	13.23	9.81	14.46	11.11	12.36	16.61	5.67	11.36	13.12		10.49	12.81	7.52	4.24	8.33	5.64	10.88	9.71	7.3	12.79	7.82	9.39	1.31	3	2.69	.	26	26	26	5	7	6	5	4	14	5	4
Peckoltia furcata	FMNH 7086	1	86.52	37.57	29.49	8.29	11.04	6.23	16.33	3.44	12.74	24.48	21.11	20.76	27.91	20.14	25.67	28.7	12.99	20.58	25.5	34.06	19.62	24.25	11.72	8.82	14.27	6.58	19.96	15.93	15.08	24.47	11.18	11.01	4.56	2.91	3.61		26	25	25	5	7	6	5	4	14	4	4
Peckoltia furcata	FMNH 7086	2	87.38	35.36	30.09	5.51	11.35	5.64	17.24	3.8	11.7	23.73	20.93	21.73	27.34	20.7	24.55	30.32	12.98	20.89	24.6	33.71	19.2	24.75	13.29	9.47	16.26	7.66	20.72	15.79	14.21	25.62	12.06	10.76	4.56	3.7	3.96		26	26	26	5	7	6	5	4	14	4	4
Peckoltia furcata	FMNH 7086	3	75.9	33.28	26.43	7.33	9.44	5.29	15.44	3.76	10.5	19.4	18.98	16.25	26.32	16.68	22.39	26.92	12.99	17.95	22.49	30.32	16.96	22.08	11.08	9.63	17.27	8.95	21.55	14.62	12.63	22.22	10.79	9.15	2.84	3.4	3.92		25	25	25	5	7	6	5	4	14	4	4
Peckoltia furcata	FMNH 7086	4	84.49	37.72	30.33	7.33	10.1	5.7	18.82	3.98	11.35	22.18	21.06	18.71	27.47	17.69	25.98	29.74	13.29	20.58	24.36	33.73	19.78	23.59	11.46	10	17.27	9.97	22.63	15.25	14.13	22.21	13.1	9.95	3	3.75	3.97		26	26	25	5	7	6	5	4	14	4	4
Peckoltia furcata	FMNH 97023	1	105.93	43.54	35.69	7.94	12.47	6.16	20.54	4.12	13.6	28.11	26.26	27.57	28.24	23.21	27.24	34.84	13.89	23.76	27.84		25.6	30.06	13.68	8.02	19.92	9.8	25.11	19.07	17.74	25.52	15.07	14.27	4.24	4.14	3.76		27	26	27	5	7	6	5	4	14	5	4
Peckoltia furcata	LACMNH 39864-10	1	98.94	41.17	33.18	7.98	11.63	5.5	19.08	4.18	11.78	23.19	23.76	24.37	28.83	22.9	27.11	33.41	16.07	22.83	27.1	33.39	21.27	27.32	12.46	8.52	17.87	10.75	20.56	18.06	15.96	28.25	14.68	15.59	4	4.54	4.87		24	25	25	5	7	6	5	4	14	4	4
Peckoltia furcata	LACMNH 39864-10	2	92.68	38.45	31.67	6.75	11.8	5.62	17.98	4.53	11.73	22.41	22.27	21.55	27.13	22.2	24.84	31.19	13.74	21.45	25.36	32.13	18.45	26.65	12.16	8.84	17.4	10.03	21.86	17.44	14.1	27.76	13.58	13.42	3.94	5.16	5		23	24	23	5	7	6	5	4	14	4	4
Peckoltia furcata	MUSM 19052	1	153.48	62.18	46.65	16.08	17.25	6.76	28.99	5.87	19.74	31.87	35.86	32.38	39.86	36.38	37.66	60.57	22.93	32.07	40.21	47.02	37.22	42.8	22.02	14.6	26.43	18.43	35.96	30.85	24.9	44.89	16.85	23.32	4.97	6.53	6.41		28	26	27	5	7	6	5	4	14	4	4
Peckoltia furcata	MUSM 19052	2	139.96	58.59	43.75	15.5	16.14	7.03	27.62	5.35	18.62	30.18	31.47	35.59	36.45	29.11	36.02	52.09	21.61	31.56	39.52	45.48	35.17	40.73	21.08	12.73	24	16.98	31.13	27.75	24.09	37.07	13.38	19.25	7.3	6.07	5.82		28	26	26	5	7	6	5	4	14	5	4
Peckoltia furcata	MUSM 19052	3	122.79	51.26	39.39	11.18	14.83	6.42	23.85	4.64	15.81	27.1	29.5	26.55	35.09	26.37	33.26	39.55	18.02	26.98	32.86	40.29	32.65	34.18	21.17	12.77	23.08	15.43	29.73	21.76	21.16	34.6	13.38	18.81	5.42	5.97	5.53		28	27	27	5	7	6	5	4	14	5	4
Peckoltia furcata	SIUC 36691	1	139.39	53.35	43.84	10.5	15.3	6.94	25.83	6.05	17.06	36.56	31.93	31.81	41.73	30.58	37.64	52.06	24.68	30.44	35.9	52.35	31.34	37.68	24.47	16.08	28.64	13.13	33.55	25.62	21.25	34.36	18.88	16.54	7.03	3.89	4.7		26	26	27	5	7	6	5	4	14	4	4
Peckoltia greedoi	MCP 21972	1	77.97	34.83	27.93	6.64	10.26	6.32	16.93	3.61	13.65	21.95	21.13	15.98	25.32	18.19	21.61	27.49	12.48	19.43	21.73		18.96	20.47	12.69	7.63	12.89	8.63	18.23	14.8	12.4	19.65	14.05	14.49	4.15	4.28	4.89	.	26	25	25	5	7	6	5	4	14	5	5
Peckoltia greedoi	MCP 21972	2	75.82	32.61	26.92	5.59	8.8	6.32	16.4	3.78	13.4	21.47	20.32	16.14	22.66	17.54	20.08	26.62	10.97	18.36	20.9		16.97	19.75	12.64	7.51	11.51	9.03	18.33	16.16	11.78	19.94	14.38	14.34	6.39	5.18	4.78	.	25	23	25		7	5	4	3	14	5	5
Peckoltia greedoi	MCP 21972	3	67.36	30.14	25.24	5.41	8.57	5.6	14.52	3.58	12.11	19.48	18.24	14.58	21.49	17.59	17.78	21.88	10.08	16.92	19.86	18.68	16.04	20.47	8.36	6.48	10.32	8.06	13.78	13.01	10.7	20.63	12.18	11.54	3.66	5.65	4.16	.	25	24	25		7	5	4	3	14	5	5
Peckoltia greedoi	MCP 21972	4	71.46	30.34	25.17	5.33	8.72	5.93	14.6	3.45	11.65	20.02	19.08	16.33	21.43	16.25	16.46	23.79	10.6	16.4	19.59	22.28	15.89	17.14	11.98	7.42	10.86	8.32	14.99	14	10.86	18.24	11.27	12.45	3.28	4.34	4.53	.	25	24	24		7	5	4	3	14	5	5
Peckoltia greedoi	MCP 21972	5	71.94	31.08	25.49	6.16	8.56	5.59	15.4	3.33	12.16	19.91	19.07	14.2	21.46	15.76	18.13	25.32	10.35	17.26	19.91		15.69	18.31	11.46	6.06	12.05	9.49	17.19	14.18	11.55	18.57	12.16	11.98	4.4	4.68	4.47	.	25	25	25		7	5	4	3	14	5	5
Peckoltia greedoi	MCP 21972	6	65.73	27.89	24.24	4.84	8.57	5.45	13.41	3.09	11.07	18.53	18.23	14.46	21.41	15.44	18.13	21.55	8.79	16.2	17.37		15.14	16.88	9.83	6.65	11.07	8.36	14.82	11.14	10.17	16.72	11.38	11.89	4.58	5.33	4.29	.	25	25	25		7	5	4	3	14	5	5
Peckoltia greedoi	MCP 21972	7	68.23	29.36	24.25	5.06	8.41	5.72	14.14	3.28	11.09	19.49	16.75	15.19	20.81	16.58	17.21	23.58	10.7	17.06	19.79	21.2	16.12	18.51	10.65	6.52	10.5	8.03	13.46	13.56	10.26	18.33	11.65	11.63	3.13	4.55	3.87	.	25	25	25		7	5	4	3	14	5	5
Peckoltia greedoi	MCP 21972	8	68.13	30.33	25.42	5.75	9.18	5.63	14.92	2.97	12.03	19.36	17.95	13.84	22.21	14.98	18.17	24.05	9.66	16.79	19.74	17.96	16	17.7	10.22	8.41	12.91	8.99	17.64	11.6	10.39	19.08	11.02		3.49	3.73	3.79	.	25	25	25		7	5	4	3	14	5	5
Peckoltia greedoi	MCP 21972	10	67.76	29.48	24.4	4.71	8.17	5.84	14.01	3.38	12.04	18.67	17.15	15.09	20.11	15.21	17.11	23.16	8.42	15.94	19.07	18.86	16.28	16.66	12.32	6.52	9.45	8.42	15.78	11.66	10.51	16.92	10.76	10.49	3.09	4.27	3.77	.	26	24	25		7	5	4	3	14	5	5
Peckoltia greedoi	MCP 21972	11	65.99	27.77	23.1	4.74	8.28	5.43	13.63	3.29	10.75	17.93	16.35	13.56	19.76	14.12	16.93	22.18	9.2	15.69	17.97	19.15	14.14	16.07	11.67	5.93	9.55	7.74	14.04	12.53	9.68	16.83	11.46	12.58	3.58	4.73	4.17	.	25	25	25		7	5	4	3	14	5	4
Peckoltia greedoi	MCP 21972	13	61.65	28.13	23.2	5.11	8.41	4.95	13.62	3.03	10.8	18.95	16.98	12.57	20.27	14.38	16.43	22.1	8.49	15.37	17.03	20.51	12.87	15.32	8.89	7.47	12.92	7.49	16.26	10.33	10.18	16.76	9.57		2.84	3.74	4.07	.	25	25	25		7	5	4	3	14	5	5
Peckoltia greedoi	MCP 21972	14	63.49	27.88	23.47	4.4	8.05	5.08	13.6	3.04	10.58	17.68	16.27	14.6	20.21	13.93	17.59	21.64	10.36	15.19	17.6	19.43	15.25	16.39	9.34	6.11	9.39	7.19	13.98	11.67	9.7	16.87	10.69	11	3.2	4.2	3.63	.	25	24	25		7	5	4	3	14	5	5
Peckoltia greedoi	MCP 21972	15	62.41	28.63	23.87	5.19	8.45	4.3	13.88	2.91	10.94	18.99	18.38	13.54	20.72	14.02	17.31	21.83	9.61	15.79	18.55	20.62	14.39	16.59	9.5	8.22	11.69	8.93	14.73	10.37	9.85	14.74	10.88		3.18	3.61	3.82	.	25	25	25		7	5	4	3	14	5	4
Peckoltia greedoi	MCP 21972	16	62.81	27.89	23.34	4.49	8.18	5.27	13.78	3.23	10.71	18.24	17.3	14.08	20.52	14.36	17.31	20.58	9.19	15.68	18.35	19.61	14.65	15.65	10.28	6.61	9.81	7.92	14.29	11.38	9.64	16.13	10.48	11.55		3.83	3.82	.	24	24	24		7	5	4	3	14	5	3
Peckoltia greedoi	MCP 21972	17	63.82	28.73	24.27	5.02	8.65	5.46	14.23	2.83	11.05	19.07	16.71	14.14	20.8	15.68	17.47	21.18	9.53	16.27	19.31	21.43	14.42	16.81	9.77	7.07	9.56	8.03	14.65	11.22	9.95	17.32	11.26	10.58	3.85	4.11	3.91	.	25	24	25		7	5	4	3	14	5	5
Peckoltia greedoi	MCP 21972	18	65.22	28.97	23.85	5.19	8.13	5.61	13.99	3.07	10.77	17.5	18.56	13.28	20.01	14.51	16.72	22.2	8.78	15.8	17.87	18.63	14.92	16.48	11.48	5.8	9.86	7.49	14.72	12.24	10.17	16.13	11.73	11.78	3.7	5.15	4.92	.	25	25	25		7	5	4	3	14	5	5
Peckoltia greedoi	MCP 21972	19	59.87	26.73	22.32	4.34	8.32	5.14	13.13	2.98	10.61	17.42	16.36	12.5	19.7	13.47	18.04	21.48	9.41	15.21	17.2	20.02	13.17	16.02	10	6.17	9.91	6.8	14.46	10.91	9.7	15.65	11.29	10.46	3.93	4.1	4.03	.	25	25	25		7	5	4	3	14	5	5
Peckoltia greedoi	MCP 21972	20	66.69	28.54	23.75	5.03	8.69	5.49	13.86	3.15	10.75	18.54	17.71	13.78	21.59	15.91	17.83	23.09	9.88	16.4	18.28	20.78	15.43	16.9	11.31	6.33	10.48	8.31	14.59	12.32	10.27	16.19	10.48	10.51	3.29	4.01	4	.	25	25	25		7	5	4	3	14	5	4
Peckoltia greedoi	MCP 21972	21	60.57	26.58	22.43	4.08	7.91	5.33	12.98	2.93	10.27	18.07	16.48	12.27	19.1	13.59	17.03	20.38	9.16	15.63	17.5	18.97	14.61	16.09	9.98	5.44	9.19	7.51	13.12	11.39	9.35	16.11	10.82	10.86	3.47	3.85	3.7	.	26	25	25		7	5	4	3	14	4	3
Peckoltia greedoi	MCP 21972	22	59.33	27.02	22.5	5.25	8.49	5.2	12.83	2.96	10.23	17.65	15.81	13.28	18.62	13.47	15.64	18.8	8.44	15.85	18.16	17.68	14.88	15.3	10.02	5.9	8.51	7.74	12.38	10.05	9.3	14.97	10.49	11.51	2.92	4.39	3.99	.	25	25	25		7	5	4	3	14	4	3
Peckoltia greedoi	MCP 21972	23	60.27	26.58	21.68	4.44	8.17	5.25	12.8	3.11	9.73	17.2	15.03	13.75	19.48	13.5	16.68	19.86	8.53	14.53	17	19.85	12.86	14.61	9.81	5.16	10.18	7.2	13.39	10.86	8.95	14.65	10.13	10.32	3.49	4.47	3.92	.	25	24	25		7	5	4	3	14	5	5
Peckoltia greedoi	MCP 21972	25	57.61	25.37	21.58	3.88	7.67	4.96	12.68	2.92	9.56	17.26	15.75	13.13	19.07	12.92	16.05	19.26	8.78	14.53	16.84	18.38	13.71	14.83	8.62	5.58	8.83	7.14	12.8	10.79	8.78	14.65	9.94	9.12	3.61	3.73	3.81	.	25	25	25		7	5	4	3	14	5	4
Peckoltia greedoi	MCP 21972	26	55.96	25.56	21.06	4.29	7.05	4.76	12.17	2.87	8.99	16.36	14.73	13.1	18.07	13.39	15.15	20.03	8.63	14.23	17.06	16.5	12.31	14.29	9.47	5.46	8.74	6.8	12.93	10.48	9.06	14.45	7.93	9.82	3.01	3.75	3.51	.	25	25	25		7	5	4	3	14	5	5
Peckoltia greedoi	MCP 21972	27	54.94	24.29	20.62	3.78	7.41	4.86	11.97	2.94	9.78	16.28	15.23	12.68	18.59	12.52	15.64	19.22	8.93	13.76	15.66	18.8	12.8	14.28	9.16	5.58	8.65			10.83	8.73	15.26	9.65	11.17	2.88	4.37	3.57	.	25	25	24		7	5	4	3	14
Peckoltia greedoi	MCP 21972	28	55.2	24.25	20.39	3.47	7.1	4.95	11.36	2.68	9.12	16.33	15.08	13.2	18.35	13	15.26	19.5	8.98	13.83	15.5	19.15	12.53	13.41	8.56	5.54	8.39	6.97	13	10.4	8.75	14.58	9.05	8.39	3.05	3.89	3.26	.	25	25	25		7	5	4	3	14	5	5
Peckoltia greedoi	MCP 21972	29	45.3	19.94	16.98	2.71	5.47	4.31	9.32	2.33	7.5	13.11	11.85	11.41	14.3	9.15	12.73	15.27	7.42	11.42	13.01	16.5	10.5	12.23	6.72	3.73	7.44	5.56	10.26	7.71	6.95	11.3	7.52	8.31	2.58	3	2.64	.	24	24	24		7	5	4	3	14	5	4
Peckoltia greedoi	MCP 21972	30	46.25	21.8	17.96	3.25	6.4	4.38	9.86	2.44	7.76	13.02	12.89	10.51	15.32	10.11	14.66	15.48	6.44	11.81	13.79	5.17	10.77	12	7.43	4.68	7.19	6.19	11.28	8.24	6.85	11.13	8.36	8.36	2.67	2.79	2.96	.	25	24	24		7	5	4	3	14	5	4
Peckoltia lineola	AUM 39245	1	88.32	39.23	32.05	7.79	11.52	6.87	18.98	4.99	12.6	27.81	25.47	17.9	29.57	20.62	24.1	28.4	12.66	23	26.47	32.81	20.72	23.93	12.78	7.81	15.45	10.41	20.4	15.59	14.84	24.15	15.94	13.85	4.92	3.46	3.78		24	23	23	5	7	6	5	4	14	5	5
Peckoltia lineola	AUM 39245	2	92.52	40.59	32.95	7.77	11.9	7.16	19.6	4.9	12.7	27.92	24.3	18.51	30.69	22.85	22.52	29.02	12.21	24.56	27.84	30.83	21.63	25.58	15.84	7.83	15.96	9.85	20.74	17.52	15.66	26.07	16.32	13.17	5.1	3.83	3.87		24	23	23	5	7	6	5	4	14	5	5
Peckoltia lineola	AUM 39245	3	94.65	40.43	33.11	7.8	12.04	7.01	19.61	4.66	14.75	24.76	24.65	19.74	28.54	20.36	22.33	32.75	12.21	25.78	28.8	30.44	22.28	26.55	13.58	10.01	20.73	13.75	25.94	16.7	15.01	25.78	14.24	14.81	4.55	4.16	2.8		26	29	26	5	7	6	5	4	14	4	4
Peckoltia lineola	AUM 39245	4	88.3	39.16	31.49	8.02	11.37	6.38	19.22	4.49	14.07	25.15	25.62	19.97	26.83	20.03	22.38	28.9	12.13	23.41	26.69	29.25	21.93	23.89	12.49	10.09	17.62	12	23.12	16.07	15.71	24.15	13.31	14.88	5.36	2.33	2.7		25	26	25	5	7	6	5	4	14	4	5
Peckoltia lineola	AUM 39245	5	83.75	37.15	30.64	6.69	11.81	6.89	18.19	5.66	14.83	22.66	22.71	17.68	26.26	19.31	19.95	27.42	11.96	22.54	26.05	28.11	20.9	23.39	12.15	9.53	18.06	11.63	21.49	15.42	14.75	23.25	13.41	14.39	6.23	3.78	3.27		26	25	24	5	7	6	5	4	14	4	5
Peckoltia lineola	MCNG 37054	1	58.28	26.25	21.53	4.63	8.09	4.88	12.48	2.71	9.23	15.19	15.9	13.88	19.35	12.05	15.85	19.56	8.06	14.83	16.83	18.57	13.49	15.57	9.24	5.84	12.37	7.37	15.17	9.23	9.1	14.13	8.5	8.6	3.55	3.02	1.73		25	26	26	5	7	6	5	4	14	4	4
Peckoltia lujani	ANSP 166770	1	61.3	24.85	21.3	3.73	7.84	5.09	11.95	2.42		17.42	18.11	15.81	18.96	13.81	15.83	20.37	7.31	14.18	16.26	18.53	12.38	16.54	9.41	4.99	9.87	6.22	13.47	11.03	8.1	14.74	9.83	10.8	3.13	3.41	3.38	.	27	26	27	5	7	6	5	4	14	5	5
Peckoltia lujani	ANSP162174	1	74.33	32.83	26.13	6.17	9.5	4.99	15.91	5.1	11.03	21.26	21.15	17.83	21.37	17.43	18.15	24.59	9.46	17.54	20.37	20.4	17.51	21.93	8.24	8.16	14.46	8.02	16.78	13.55	11.12	20.53	13.49	12.24	4.08	3.18	3.46	.	26	26	26	5	7	6	5	4	14	5	5
Peckoltia lujani	ANSP162174	2	68.92	29.18	24.41	5.25	9.24	4.74	14.4	3.21	9.77	19.46	17.62	15.62	20.36	14.31	18.79	23.83	9.22	14.72	18.44	18.79	14.34	19.64	7.8	5.8	12.33	5.76	16.63	12.13	8.96	17.16	12.18	10.15	3.47	4.36	3.53	.	26	26	26	5	7	6	5	4	14	5	5
Peckoltia lujani	ANSP162174	3	68.47	28.91	23.65	5.35	8.4	4.64	13.82	4.03	9.52	18.94	18.61	15.87	19.09	15.14	16.64	23.06	8.89	14.66	17.52	18.06	14.75	18.68	9.57	6.3	13.02	6.2	13.73	12.34	9.18	16.92	10.76	11.89	4.67	3.83	3.13	.	26	26	26	5	7	6	5	4	14	5	5
Peckoltia lujani	ANSP162174	4	70.15	28.87	24.06	4.89	9.19	4.84	13.86	3.41	10.23	18.87	17.83	16.17	19.51	16.12	17.47	23.74	9.03	15.44	17.95	18.63	14.8	18.68	11.8	8.05	12.57	5.76	15.82	10.42	9.95	16.65	11.5	11.29	3.7	3.47	3.72	.	26	26	26	5	7	6	5	4	14	5	5
Peckoltia lujani	ANSP162174	5	61.66	25.91	21.86	3.94	9.14	4.42	12.46	2.62	9.18	17.31	16.08	14.85	18.64	13.54	17.63	20.51	9.42	13.9	15.91	15.9	13.05	15.82	8.63	6.66	9.92	5.48	13.51	9.88	7.85	13.64	10.95	9.18	2.9	3.42	2.64	.	26	26	26	5	7	6	5	4	14	5	5
Peckoltia lujani	ANSP162174	6	67.62	27.78	23.78	4.87	8.56	4.89	13.92	2.73	9.53	19.39	17.66	16.01	20.4	15.2	18.63	23.6	8.46	15.19	17.18	19.3	15.69	17.98	9.67	6.57	10.33	6.35	15.09	12.28	9.63	15.72	12.33	11.76	3.3	2.68	3.45	.	25	26	26	5	7	6	5	4	14	5	5
Peckoltia lujani	ANSP162174	7	66.71	26.27	22.51	3.9	8.68	4.68	12.68	3.21	9.9	17.43	16.6	15.37	18.63	15.28	18.21	21.69	8.47	14.98	16.98		13.44	17.56	9.05	6.75	12.48	6.27	14.96	10.48	9.92	14.19	11.66	11.05	3.6	3.49	3.61	.	26	26	26	5	7	6	5	3	14	5	5
Peckoltia lujani	ANSP162174	8	55.42	23.22	20.1	4.15	7.46	3.6	10.22	2.91	8.47	16.37	14.62	13.39	15.75	11.61	12.46	18.56	7.24	12.88	14.53	11.98	12.96	14.62	6.54	6	10.16	6.36	14.9	12.41	7.75	14.42	9.43	8.94	3.51	2.24	2.19	.	26	26	26	5	7	6	5	4	14	5	5
Peckoltia lujani	ANSP162174	9	46.02	19.89	17.17	3.49	6.73	2.89	10.08	2.68	7.48	13.61	12.76	10.88	13.48	10.48	11.56	14.09	6.06	11.03	12.87	11.26	9.8	12.39	5.72	5.86	8.95	5.57	11.36	10.23	6.84	11.51	8.21	7.57	2.81	1.77	2.19	.	26	25	25	5	7	6	5	4	14	5	4
Peckoltia lujani	ANSP162174	10	60.29	23.85	21.52	3.21	7.67	4.18	12.58	3.73	8.84	16.88	16.92	14.47	17.77	13.88	15.52	20.79	7.32	13.82	14.66	14.17	13.84	16.88	8.36	5.86	11.33	6.63	14.34	13.45	8.54	15.42	10.65	9.98	3.45	2.2	2.78	.	27	26	27	5	7	6	5	4	14	5	5
Peckoltia lujani	ANSP162174	11	57.11	25.31	20.98	4.36	7.21	4.08	12.06	3.4	8.49	16.19	16.3	14.64	16.18	12.27	13.44	17.46	6.69	13.59	15.92	14.76	13.14	16.33	6.38	6.71	12.13	5.84	14.04	8.42	8.03	15.21	9.07	10.04	3.14	3.06	3.19	.	26	25	26	5	7	6	5	4	14	5	5
Peckoltia lujani	ANSP162174	12	57.62	24.57	20.92	4.45	7.07	3.72	12.06	3.38	8.76	16.62	17.09	14.85	17.4	13.23	15.18	19.32	8.13	14.38	16.65	17.05	13.13	14.7	8.8	6.33	11.43	6.52	14.35	9.73	8.59	14.62	10.39	9.82	3.41	2.21	2.71	.	26	26	26	5	7	6	5	4	14	5	5
Peckoltia lujani	ANSP162174	13	60.85	26.63	22.27	5.37	8.41	3.86	12.29	3.99	9.08	17.79	15.67	15.21	18.79	13.39	15.17	19.25	8.2	14.65	16.95	10.72	12.75	16.07	8.25	7.18	12.8	5.22	14.59	9.72	8.51	15.98	10.51	10.24	3.29	2.66	2.96	.	26	26	27	5	7	6	5	4	14	5	5
Peckoltia lujani	AUM 53474	1	37.35	16.16	13.76	3.02	5.08	3.24	7.22	1.84	6.28	9.83	10.76	8.72	10.73	8.84	8.84	10.98	4.52	8.16	10.09	10.74	5.8	11.18	3.63	3.33	5.63	3.75	7.49	5.96	4.25	8.35	5.83	5.75	1.63	1.88	1.75	.	23	23	25	5	7	6	5	4	14	5	4
Peckoltia lujani	AUM 53523	1	75.14	30.93	30.94	6.98	8.97	5.13	13.91	3.78	11.3	19.14	20.94	16.15	20.83	17.05	19.1	26.99	10.71	15.94	18.76	20.1	14.62	21.22	10.84	5.93	11.94	6.93	16.13	13.49	9.46	18	13.37	14.01	3.99	3.91	4.17	.	26	25	25	5	7	6	5	4	14	5	4
Peckoltia lujani	AUM 53523	2	62.92	25.89	21.29	4.69	7.78	4.68	11.71	3.19	10.2	17.02	16.81	13.55	17.33	14.2	15.05	22.5	8.29	14.16	16.49		13.14	17.01	11.27	5.25	9.06	6.06	12.84	11.52	7.74	15.3	11.09	12.41	2.97	2.95	2.8	.	26	25	25	5	7	6	5	4	14	5	4
Peckoltia lujani	AUM 53523	3	57.75	24.33	20.39	3.53	7.5	4.52	11.06	3.03	9.13	14.98	15.89	13.06	15.94	13.31	13.84	20.43	7.44	13.22	15.2		11.66	16.27	8.65	4.62	9.03	5.35	12.47	10.7	7.14	15.24	9.7	11.36	3.28	2.99	2.81	.	26	25	26	5	7	6	5	4	14	5	4
Peckoltia lujani	AUM 53979	1	34.33	14.52	11.28	3.26	5.17	2.64	6.95	1.88	6.18	9.83	9.48	8.58	10.1	6.7	8.14	11.3	3.47	8.26	8.84	8.64	6.7	8.58	4.98	3.24	5.59	3.98	7.51	6.4	4.13	7.35	5.8	6.55	1.37	1.46	1.61	.	26	25	25	5	7	6	5	4	14	5	4
Peckoltia lujani	AUM 53979	2	31.57	13.75	11.43	2.1	4.99	2.48	6.08	1.92	5.36	8.92	8.22	9.69	8.98	6.68	7.99	10.38	3.82	7.77	9.35	8.84	5.66	7.32	3.56	3.21	5.79	3.31	7.27	5.64	4.13	6.72	5.56	6.34	1.3	1.15	1.81	.	24	23	24	5	7	6	5	4	14	5	4
Peckoltia lujani	NMW 47233	1	56.59	24.41	20.38	3.94	7.75	3.81	11.33	3.49	7.51	14.49	15.69	13.55	16.58	12.49	15.64	19.91	7.41	12.53	14.45	17.78		14.7	8.48	6.87	11.82	6.29	14.02	9.69	7.84	13.87	9.52	9.6	2.52	2.9	2.89	.	27	26	26	5	7	6	5	4	14	5	5
Peckoltia lujani	NMW 47233	2	71.23	28.5	23.71	4.76	8.19	4.93	13.29	3.72	8.7	16.48	18.16	16.12	19.88	14.76	16.8	24.4	9.08	15.14	18.21	19.54		18.06	8.94	7.54	13.54	6.23	16.78	11.63	8.97	15.92	11.79	11.26	3.53	3.87	2.97	.	27	26	26	5	7	6	5	4	14		5
Peckoltia lujani	ROM 93352	1	64.46	26.79	22.4	4.81	7.91	5.01	12.37	3.21	10.26	17.63	16.43	13.71	17.13	14.46	15.56	21.06	7.87	14.38	16.78	15.73	13.39	17.11	9.96	5.23	10.5	5.21	13.79	10.98	8.14	16.33	12.79	12.69	2.35	2.67	2.82	.	26	24	25	5	7	6	5	4	14	5	5
Peckoltia lujani	ROM 93352	2	58.43	24.84	20.62	4.26	7.55	4.21	11.44	2.74	9.12	16.75	15.34	13.57	16.69	13.49	14.72	20.29	6.99	13.28	15.89	12.64	12.61	15.41	8.45	5.28	8.99	5.6	11.43	11.09	7.73	16.25	10.16	11.25	2.51	2.62	2.84	.	26	25	25	5	7	6	5	4	14	5	5
Peckoltia lujani	ROM 93352	3	59.49	25.27	20.65	4.36	7.42	4.98	11.55	2.91	9.85	17.61	15.33	13.34	16.91	13.01	14.3	20.51	8.91	13.91	16.4	16.17	13.14	16.39	9.03	4.53	8.84	5.83	12.55	11.78	8.22	15.54	11.11	12.14	2.33	2.41	3.04	.	26	26	26	5	7	6	5	4	14	5	5
Peckoltia lujani	ROM 93352	4	58.36	24.88	21.02	4.04	7.65	4.5	11.39	2.82	9.42	16.28	15.71	13.79	16.6	13.17	13.58	20.21	7.77	13.52	15.28	15.31	11.03	15	9.41	4.16	8.39	5.16	11.97	10.71	7.57	14.3	10.6	11.67	2.16	2.73	2.51	.	25	25	25	5	7	6	5	4	14	5	4
Peckoltia lujani	ROM 93352	5	54.45	23.47	19.38	4.07	7.27	4.37	10.24	2.72	8.8	15.4	14.19	12.73	15.14	12.11	13.14	18.62	6.66	12.98	15	13.43	11.74	14.04	8.9	3.57	7.32	4.91	10.66	10.42	7.13	14.01	9.47	10.51	2.33	2.18	2.1	.	26	26	25	5	7	6	5	4	14	4	4
Peckoltia lujani	ROM 93352	6	55.92	24.05	19.11	3.62	6.93	4.29	10.51	2.53	8.75	15.47	14.14	13.06	15.52	12.59	14.08	19.38	7.46	12.73	14.59	15.09	11.1	14.78	9.45	4.56	10.04	5.7	12.18	10.02	6.96	13.99	10.11	10.01	3.22	2.49	3.03	.	25	26	26	5	7	6	5	4	14	5	4
Peckoltia lujani	ROM 93352	7	54.34	22.65	19.05	3.73	7.24	4.16	10.68	2.87	8.78	14.94	14.42	11.98	15.89	11.94	12.52	18.27	6.77	12.29	14.18	15.28	10.9	14.15	8.23	3.94	6.71	5.29	11.09	10.16	6.93	13.9	10.05	10.05	1.95	2.35	2.71	.	25	24	25	5	7	6	5	4	14	5	4
Peckoltia lujani	ROM 93352	8	52.88	22.35	18.96	3.28	7.12	3.62	10.35	2.61	8.37	15.22	12.11	12.06	15.36	11.36	13.05	17.54	6.79	12.15	14.19	15.28	11.11	14.05	7.14	4.37	7.7	5.68	11.69	9.31	7.18	14.17	9.3	9.3	2.78	2.17	2.76	.	25	24	25	5	7	6	5	4	14	5	4
Peckoltia lujani	ROM 93352	9	51.83	22.43	18.59	3.56	6.98	4.2	10.11	2.64	8.53	14.41	12.19	12.12	14.92	11.46	13.18	17.98	7.3	12.28	14.32	13.61	11.55	13.76	8.07	4.08	7.74	4.39	9.82	9.14	7.01	12.17	9.49	9.21	2.11	2.44	2.3	.	23	25	25	5	7	6	5	4	14	5	4
Peckoltia lujani	ROM 93352	10	48.1	20.37	17.14	3.13	6.62	3.93	9.16	2.54	8.21	13.28	12.47	11.26	13.56	9.96	11.77	15.84	6.56	11.39	13.36	12.78	10.23	12.84	8.96	4.59	7.52	5.02	9.61	8.19	6.35	11.81	9.15	9.47	1.88	2.21	2.91	.	25	25	25	5	7	6	5	4	14	5	4
Peckoltia lujani	ROM 93352	11	44.7	19.54	16.18	2.53	6.42	3.67	9.07	2.46	7.9	12.89	12.17	10.79	13.09	9.81	11.08	15.53	5.6	10.79	12.72	12.14	9.6	10.95	7.3	3.58	7	4.58	9.2	8.02	6.18	10.4	8.98	9.17	2.19	1.71	2.44	.	25	26	26	5	7	6	5	4	14	5	4
Peckoltia lujani	ROM 93352	12	37.95	16.51	14.13	2.29	5.78	2.85	7.81	1.99	6.5	10.67	10.63	9.14	10.82	8.35	9.8	12.53	4.42	9.34	10.98	10.89	7.77	9.84	5.06	2.98	5.49	3.84	7.65	6.79	4.67	8.84	7.29	6.31	1.75	1.68	2.18	.	24	24	25	5	7	6	5	4	14	5	4
Peckoltia mystax	AUM 54314	1	104.63	40.58	38.17	7.06	12	7.21	20.49	4.29	14.81	27.61	27.04	23.18	32.61	23.06	29.18	40.78	18.97	22.75	25.62	34.15	26.08	30.7	16.06	9.88	16.99	11.26	23.92	21.81	15.57	28.75	15.99	16.2	6.45	4.31	4.04		26	26	26	5	7	5	6	4	14	4	4
Peckoltia oligospila	BMNH 1849.11.8	1	87.24	36.33	31.68	5.59	10.84	6.06	18.95	3.56	11.16	26.58	24.58	18.67	29.14	19.29	25.77	30.61	13.85	22.25	25.95	35.2	21.96	25.29	14.8	7.75	14.77	10.07	19.33	17.36	14.27	23.11	14.26	12.98	4.62	3.56	3.34		25	25	26	5	7	6	5	4	14	5	4
Peckoltia oligospila	MCP 14535	1	69.96	30.03	25.51	4.42	8.26	5.11	14.71	3.41	10.75	19.42	18.05	15.52	22.33	15.97	19.46	24.58	9.99	17.69	20.01	25.37	15.4	18.22	12.1	6.78	13.52	9.5	17.53	14.2	10.99	18.34	12.12	12.48	4.87	4.09	3.51		24	25	25	5	7	6	5	4	14	5	4
Peckoltia oligospila	MCP 14535	2	60.03	25.11	21.48	4.54	8.09	4.47	11.91	2.81	9.32	15.7	15.51	14.72	19.2	12.9	17.41	23.3	9.08	15.94	17.07	21.04	13.09	15.39	9.02	6.37	10.72	7.84	14.65	13.79	9.25	14.56	9.48	9.52	2.42	2.75	2.6		26	24	26	5	7	6	5	4	14	5	3
Peckoltia oligospila	MCP 14535	3	55.32	23.55	20.1	3.51	7.66	4.35	10.89	2.92	9.09	15.74	13.87	13.07	18.65	12.01	16.12	20.31	7.93	14.42	16.27	20.83	12.54	14.18	8.15	6.74	9.55	7.41	13.73	10.63	8.36	13.33	9	10.33	2.74	2.58	2.81		25	24	25	5	7	6	5	4	14	4	3
Peckoltia oligospila	MCP 14535	4	56.64	24.34	20.99	3.54	7.92	4.36	11.44	2.96	8.63	14.41	14.94	13.87	17.08	11.76	14.52	19.42	7.56	14.31	16.37	16.57	12.45	14.31	8.91	5.26	9.99	7.58	14.9	11.42	8.35	14.42	10.65	10.39	3.16	3.05	2.97		26	24	25	5	7	6	5	4	14	4	4
Peckoltia oligospila	MCP 14535	5	54.31	23.42	20.09	3.46	7.73	4.27	10.93	2.92	8.82	15.46	14.66	11.44	18.24	12.39	15.93	18.65	7.98	14.12	15.72	18.94	11.58	14.61	7.93	5.33	9.15	7.33	14.52	9.46	8.77	13.49	9.51	9.27	3.12	2.79	2.65		24	24	25	5	7	6	5	4	14	5	3
Peckoltia oligospila	MCP 21967	1	101.68	41.98	33.91	7.42	11.63	6.84	19.96	4.79	15.15	25.92	26.15	24.45	31.89	24.23	26.25	35.09	14.05	25.9	29.51	36.74	27.35	28.91	12.36	13.28	21.08	12.62	26.27	18.79	16.94	29.58	14.34	15.05	6.34	4.03	3.69		26	25	26	5	7	6	5	4	14	4	4
Peckoltia oligospila	MCP 21971		109	45.28	37.59	8.62	13.78	7.06	22.83	4.82	16.42	28.07	27.94	24.64	33.79	25.55	29	39.22	17.04	27.72	31.38	35.25	25.77	30.72	14.54	13	20.99	13.86	27.54	19.45	17.52	29.24	15.64	16.05	6.8	3.15	5.04		26	24	25	5	7	6	5	4	14	4	4
Peckoltia oligospila	MCP 21971		101.93	42.21	34.66	8.28	13.45	6.69	21.07	4.9	16.1	26.08	24.69	20.89	32.73	24.05	26.84	37.95	17.88	26.25	30.38	35.93	25.46	29.53	15.77	11.67	19.42	14.3	25.42	20.38	18.47	29.11	15.08	14.86	5.78	3.85	4.5		26	25	26	5	7	6	5	4	14	5	4
Peckoltia oligospila	MCP 21971		98.44	41.11	33.21	8.03	11.66	6.93	19.36	4.3	14.19	25.32	23.58	21.62	30.7	22.69	26.08	34.85	13.9	26.69	30.14	35.79	24.24	28.02	14.07	12.82	19.79	12.78	25.23	19.13	16.75	26.68	13.9	14.89	6.94	5.12	4.82		26	25	26	5	7	6	5	4	14	5	4
Peckoltia oligospila	MCP 21971		104.22	40.3	34.84	7.73	13.17	6.63	21.5	4.99	16.04	26.59	26.9	21.94	30.2	22.91	27.21	36.82	13.99	26.68	29.67	34.88	24.09	30.56	13.45	13.58	21.95	13.6	27.3	18.45	16.63	27.08	15.17	17.97	7.89	4.67	3.39		26	24	26	5	7	6	5	4	14	5	4
Peckoltia oligospila	MCP 21971		93.42	39.21	32.51	7.26	12.41	6.87	19.01	3.94	13.98	23.09	24.01	20.95	29.72	19.47	24.2	32.47	14.71	23.8	27.02	35.46	22.26	26.31	14.07	11.55	19.7	11.67	23.25	17.32	14.8	24.17	11.82	11.83	5.07	4.62	3.3		26	26	26	5	7	6	5	4	14	4	4
Peckoltia oligospila	MCZ 62116	1	136.13	55.39	44.53	11.34	16.52	7.75	27.84	6.27	20.1	39.77	32.62	34.12	41.42	31.02	33.62	48.76	19.15	33.58	39.69	49.81	32.33	38.14	22.19	10.42	24.22	10.95	32.51	25.41	21.66	34.53	18.68	17.71	7.51	3.88	4.66		25	24	26	5	7	6	5	4	14	4	4
Peckoltia oligospila	MZUSP 23872	1	83.6	35.41	29.37	6.12	10.31	6.76	16.87	3.55	14.39	24.53	21.45	18.38	28.24	19.81	24.48	30.12	13.19	21.29	23.58		20.87	23.09	14.17	7.64	13.28	9.58	18.22	17	13.45	23.57	12.69	14.11	5.69	3.48	3.79		26	25	26	5	7	6	5	4	14	5	4
Peckoltia oligospila	MZUSP 53398	1	135.67	58.22	46.09	13.88	16.14	8.37	28.08	6.31	21.83	41.64	35.32	31.77	43.58	32.44	37.44	48.22	21.64	34.23	41.51		35.56	37.81	25.31	11.44	21.38	15.64	28.95	27.22	22.2	37.88	20.63	20.16	8.82	6.28	6.56		26	24	25	5	7	6	5	4	14	5	4
Peckoltia oligospila	NMW 48065	1	111.79	49.11	38.8	11.12	12.59	6.7	23.88	6.24	14.46	35.11	29.44	21.71	38.07	26.8	32.05	40.07	19.04	27.64	32.82	42.35	30.43	32.95	16.46	12.97	19.91	16.69	27.71	23.59	19.65	31.62	17.16	15.43	7.48	3.9	3.9		24	24	25	5	7	6	5	4	14	5	4
Peckoltia pankimpuju	AUM 45595	1	130.12	52.64	40.7	12.39	16.54	3.99	24.29	3.82	13.07	34.56	28.78	26.42	41.44	28.37	34.85	51.28	21.48	28.77	35.16	38.53	27.03	27.01	29.13	11.61	25.05	13.94	30.69	27.2	18.08	29.61	18.6	19.09	4.38	5.52	5.67	.	28	28	28	5	7	6	5	4	14	4	2
Peckoltia pankimpuju	AUM 45595	2	98.49	39.68	30.97	8.89	12.35	2.83	17.75	2.73	11.52	26.7	23.06	22.13	29.14	21.59	26.7	37.64	17.67	20.9	26.35	30.45	19.23	20.37	18.25	9.35	20.88	10.63	24.44	20.13	13.57	21.05	15.59	14.87	3.4	4.24	4.77	.	28	28	28							4	2
Peckoltia relictum	AUM 45531	1	87.34	37.49	28.59	9.27	10.82	7.26	15.62	3.92	14.1	25.1	21.85	22.93	24.76	20.15	20	28.55	11.3	20.53	25.91	24.8	18.91	22.89	14.3	9.88	15.27	8.3	17.86	16.32	14.53	21.08	12.57	15.99	1.45	6.13	6.08		26	25	25	5	7	6	5	4	14	4	2
Peckoltia relictum	AUM 45531	3	74.17	31.17	23.94	6.6	8.61	5.97	13.32	2.94	11.73	19.81	18.19	18.76	21.33	16.88	18.26	25.55	10.62	17.47	21.53	21.63	15.92	19.96	9.46	8.04	14.65	7.26	18.55	13.35	11.85	19.87	11.32	15.61	2.75	5.9	5.82		26	25	26	5	7	6	5	4	14	6	2
Peckoltia relictum	AUM 45531	4	77.39	31.9	25.07	6.42	9.6	5.99	13.9	3.34	12.15	23.25	19.42	19.71	21.01	17.23	17.21	26.35	12.29	19.22	22.85	22.41	18.78	20.54	9.79	8.2	16.05	7.56	19.15	15.07	12.12	21.67	11.54	15.69	2.06	6.11	5.62		25	24	25	5	7	6	5	4	14	4	2
Peckoltia relictum	AUM 45531	6	55.68	23.37	19.71	4.01	7.23	4.83	10.87	2.27	9.46	15	13.59	15.43	15.2	13.87	13.51	20.42	6.53	12.91	15.63	16.62	10.81	14.4	5.84	6.08	11.28	5.17	15.31	9.48	7.94	12.61	9.05	12.21	1.1	4.38	4.17		25	24	25	5	7	6	5	4	14	6	3
Peckoltia relictum	AUM 45531	7	56.99	23.23	19.74	3.54	7.03	4.65	10.56	2.25	8.53	15.53	14.46	14.2	15.87	13.48	14.52	21.64	7.08	13.39	15.4	16.43	10.9	14.21	5.69	7.12	12.57	5.8	15.02	9.35	8.29	12.2	9.82	12.16	1.55	4.67	4.54		25	24	25	5	7	6	5	4	14	5	3
Peckoltia relictum	AUM 45531	8	55.51	22.2	18.75	3.76	6.44	4.63	10.34	2.04	8.15	15.51	13.16	14.7	15.23	14.11	13.19	18.49	7.05	12	14.58	16.76	10.79	14.25	5.68	6.97	13.14	5.21	15.33	8.46	7.89	13.25	8.54	11.47	1.26	3.58	3.66		25	24	25	5	7	6	5	4	14	5	3
Peckoltia relictum	AUM 45531	9	58.19	24.2	20.18	3.43	7.64	4.78	10.93	2.04	9.46	15.86	13.89	14.73	16.26	11.66	13.86	19.33	7.41	13.4	15.47	17.3	13.05	14.93	6.91	6.45	10.39	5.65	14.73	9.86	8.08	13.82	9.48	12.44	1.71	4.52	4.48		25	24	25	5	7	6	5	4	14	5	3
Peckoltia relictum	AUM 45531	10	58.56	23.98	19.83	3.79	7.2	4.41	11.17	2.29	9.95	16.12	13.72	14.42	16.87	13.33	14.56	20.57	7.15	13.6	16.46	17.89	12.12	15.06	6.8	6.65	11.88	5.83	15.46	9.79	8.81	13.32	9.87	12.17	1.84	4.2	3.98		25	23	25	5	7	6	5	4	14	5	3
Peckoltia relictum	AUM 45531	11	53.37	21.43	18.79	3.49	6.74	4.41	9	2.08	8.97	13.8	12.73	13.6	15.77	10.85	12.39	18.61	5.78	12.95	15.06	13.85	11.74	14.38	6.41	5.94	11.39	4.44	13.85	9.23	6.64	10.34	9.02	11.62	1.38	3.99	3.58		24	23	25	5	7	6	5	4	14	4	2
Peckoltia relictum	AUM 45531	12	39.27	16.09	13.74	2.13	5.13	3.24	7.09	1.26	5.62	10.49	10.02	10.47	10.6	7.81	8.85	14.28	4.92	9.21	9.96	11.83	7.95	11.67	3.72	4.39	8.87	3.49	10.28	5.69	5.6	7.44	7.25	7.97	0.82	2.8	2.78		25	25	26	5	7	6	5	4	14	4	3
Peckoltia relictum	AUM 45531	13	36.35	15.38	13.93	1.95	4.71	2.69	6.9	1.4	5.68	10.28	9.65	9.81	10.34	7.26	8.78	11.8	4.16	8.65	9.49	10.78	7.7	9.36	3.99	4.24	8.53	3.67	10.16	5.42	5.01	7.35	7.16	8.55	0.75	2.86	2.65		24	24	25	5	7	6	5	4	14	5	4
Peckoltia relictum	AUM 45538	1	56.29	23.81	19.58	4.35	7.41	5.06	10.6	2.4	8.72	16	15.23	13.09	16.49	11.89	13.93	20.71	7.27	13.97	16.55	16.44	12.84	14.68	6.46	6.71	12.32	5.42	15.45	10.34	8.08	14.42	9.87	12.15	1.56	4.09	3.57		24	24	25	5	7	6	5	4	14	5	3
Peckoltia relictum	AUM 45538	2	61.34	26.68	21.24	5.47	7.57	5.04	11.52	2.44	9.42	17.65	16.97	13.22	17.47	13.3	15.07	23.45	7.51	14.9	17.61	18.45	17.63	17.48	6.69	8.08	13.18	6.54	16.18	11.18	9.36	16.58	10.5	13.6	1.21	5.15	4.23		24	23	25	5	7	6	5	4	14	5	3
Peckoltia relictum	AUM 45538	3	57.04	24.62	19.77	4.85	6.98	4.95	11.2	2.39	9.78	16.64	15.26	13.59	16.93	11.85	12.53	20.24	7.2	13.79	16.95	15.11	13.97	15.18	6.94	6.21	11.09	5.19	14.9	10.04	8.6	15.66	10.47	12.69	1.58	4.15	4.08		25	24	26	5	7	6	5	4	14	5	3
Peckoltia relictum	AUM 45538	4	53.3	22.66	18.08	4.73	6.92	4.41	9.59	2.28	8.7	14.79	14.11	10.87	15.42	11.17	13.6	19.55	7.5	13.63	15.34	14.66	11.79	14.11	6.12	6.34	10.92	4.91	13.68	9.54	7.67	13.85	9.42	11.38	2.12	4	3.93		25	24	26	5	7	6	5	4	14	5	3
Peckoltia relictum	AUM 45538	5	55	23.44	19.2	4.66	6.78	4.79	10.11	2.39	9.27	15.71	14.41	12.52	16.31	11.18	13.33	20.3	7.92	12.82	15.59	15.96	12.57	14.46	5.99	6.41	12.22	5.28	14.68	9.96	8.51	14.67	10.14	12.92	1.79	4.41	4.24		25	24	25	5	7	6	5	4	14	5	4
Peckoltia relictum	AUM 45538	6	52.76	23.13	18.5	4.42	6.97	4.58	10.28	2.6	8.7	14.52	14.12	11.66	15.79	11.23	12.9	18.58	6.72	14.1	15.95	14.18	11.81	13.82	6.77	6.22	11.02	5.01	13.76	9.29	8.16	12.55	9.28	11.53	1.58	3.6	4.22		25	24	25	5	7	6	5	4	14	5	3
Peckoltia relictum	AUM 45538	9	51.94	22.45	18.4	4.2	6.15	4.58	9.69	2.13	8.26	15.24	13.26	11.18	15.91	11.55	13.83	18.01	7	14.52	15.64	14.49	12.31	15.01	5.76	6.35	11.35	5.55	13.44	9.44	8.19	13.66	8.54	11.68	1.9	4.31	4.15		25	24	25	5	7	6	5	4	14	4	3
Peckoltia relictum	AUM 45538	10	49.81	21.53	18.36	4.84	6.69	4.58	9.38	2.07	8.6	13.75	12.72	13.05	13.56	10.37	11.18	18.55	6.47	12.07	13.96	12.98	10.84	13.23	5.32	6.09	10.92	4.76	13.6	8.93	7.43	12.23	8.5	10.54	1.51	3.69	3.51		25	24	25	5	7	6	5	4	14	5	3
Peckoltia relictum	AUM 45538	12	44.65	19.93	16.76	3.72	6	4.1	8.5	1.97	7.82	12.73	12.09	10.47	13.35	9.88	11.97	16.13	6.03	11.57	12.95	13.82	9.69	12.27	5.59	5.39	9.28	3.71	11.33	8.29	6.53	10.76	7.82	10.8	1.16	3.84	3.49		25	24	25	5	7	6	5	4	14	4	3
Peckoltia relictum	AUM 45538	13	45.11	19.76	15.8	4.17	5.81	4.16	8.48	1.82	7.72	11.89	11.47	10.28	12.55	9.24	10.66	16.26	5.84	11.08	10.93	13.26	9.26	11.42	5.2	5.37	9.41	4.11	11.43	7.73	6.05	11.06	7.34	9.17	1.6	3.5	3.63		24	24	25	5	7	6	5	4	14	5	4
Peckoltia relictum	AUM 45538	14	51.87	22.31	18.28	4.08	6.46	4.41	9.43	2.2	7.99	14.54	13.32	12.85	14.84	11.25	12.84	18.24	6.45	13.71	14.98	14.28	11.07	13.67	5.7	5.77	10.87	4.46	14.1	8.92	7.9	12.72	9.69	11.39	1.18	3.58	3.6		24	24	25	5	7	6	5	4	14	5	3
Peckoltia relictum	AUM 45538	15	51.92	22.82	18.45	4.33	6.97	4.76	10.19	2.44	9.13	15.31	14.94	12.6	16.68	11.51	13.62	18.84	7.43	13.32	15.68	16.13	12.12	14.18	6.04	5.04	10.83	4.91	14.23	9.58	8.16	13.7	9.18	11.37	1.9	3.94	3.78		25	24	25	5	7	6	5	4	14	5	3
Peckoltia relictum	AUM 45538	16	53.94	22.22	19.2	3.66	6.82	4.71	9.91	2.43	8.46	14.48	13.21	13.16	14.36	11.84	11.75	20.18	6.54	13.04	14.7	14.95	10.83	14.01	5.19	5.6	12.49	5.1	14.81	9.96	8	13.84	9.2	11.23	1.44	3.98	3.93		26	24	26	5	7	6	5	4	14	5	3
Peckoltia relictum	AUM 45538	17	53.98	22	18.31	3.58	6.81	4.59	9.82	2.29	9.02	14.53	13.37	11.45	14.87	11.09	12.86	16.35	5.93	14.84	15.18	14.96	12.63	14.12	4.8	5.54	10.81	4.74	13.22	9.39	7.96	13.1	10.18	11.76	1.89	3.66	3.63		24	23	25	5	7	6	5	4	14	5	3
Peckoltia relictum	AUM 45538	18	53.87	22.88	18.27	4.64	6.67	4.55	9.98	2.53	9.33	14.91	14.22	11.62	15.54	11.58	13.14	18.43	7.56	14.28	14.63	15.14	12.79	14.44	5.8	5.96	10.83	5.24	14.87	10.59	7.8	13.57	9.46	11	1.68	3.98	3.88		24	24	25	5	7	6	5	4	14	5	3
Peckoltia relictum	AUM 45538	19	51.4	21.77	18.27	3.88	6.62	4.32	9.62	2.26	9.35	14.13	14.01	11.87	14.81	10.85	12.98	19.35	6.2	13.82	14.18	14.34	10.9	13.46	4.37	5.93	12.66	4.28	14.57	8.98	7.62	13.68	9.28	11.02	2.18	3.87	3.91		25	25	25	5	7	6	5	4	14	6	3
Peckoltia relictum	AUM 45538	22	47.48	20.16	17.4	3.82	6.18	4.2	8.85	2.55	8.43	12.73	13.13	10.71	14.3	10.63	12.36	17.23	6.13	11.65	13.73	14.03	9.57	12.61	4.92	5.89	10.68	4.86	12.61	7.79	6.79	12.58	8.47	10.34	1.05	3.55	3.69		25	24	25	5	7	6	5	4	14	5	3
Peckoltia relictum	AUM 45538	23	47.77	20.04	16.46	4.35	6.35	4.2	8.91	2.07	8.65	13.05	12.3	11.14	13.5	10.19	11.55	17.77	5.48	12.27	14.31	12.68	10.85	12.53	6.87	6.16	10.81	4.79	13.3	8.82	7.57	11.71	8.27	10.43	1.1	3.92	3.57		24	25	24	5	7	6	5	4	14	5	3
Peckoltia relictum	AUM 45538	24	48.26	20.37	16.99	3.9	6.28	4.3	9.27	1.7	7.66	13.17	12.72	12.27	14.29	9.97	12.39	17.38	6.47	10.97	13.39	14.62	9.9	12.96	6.36	5.2	9.62	4.53	13.84	8.67	7.39	12.14	8.59	10.96	1.2	3.76	3.41		24	24	25	5	7	6	5	4	14	4	3
Peckoltia relictum	AUM 45538	25	50.58	21.86	18.16	4.28	6.87	4.71	10.26	2.36	8.58	14.29	13.02	12.05	13.33	10.12	13.99	18.13	6.52	12.77	14.76	14.83	10.83	13.48	5.02	5.49	11.41	4.09	13.69	9.28	8.48	13.34	8.47	11.32	1.81	3.86	3.35		25	24	25	5	7	6	5	4	14	5	3
Peckoltia relictum	AUM 45538	26	46.47	19.89	16.56	3.7	6.18	3.99	8.77	2.15	8.2	12.94	12.35	10.2	13.45	9.91	11.28	16.29	6.12	11.44	13.36	13.6	10.02	13.34	6.03	6.4	9.22	4.27	11.57	8.53	6.9	11.59	8.32	11.1	1.18	3.85	3.83		24	24	26	5	7	6	5	4	14	5	3
Peckoltia relictum	AUM 45538	28	45.24	19.62	18.12	3.43	6.08	4.21	8.86	2.08	7.62	12.64	11.09	10.22	12.99	9.69	10.53	15.36	5.59	11.45	13.02	12.13	9.94	11.67	6.68	5.18	9.67	4.72	11.69	7.69	6.04	11.3	7.83	9.54	1.55	3.51	3.61		24	24	24	5	7	6	5	4	14	5	4
Peckoltia relictum	AUM 45538	29	43.3	19.28	15.99	3.55	6.17	3.82	8.4	1.83	7.83	12.35	12.26	9.99	12.88	9.54	10.97	14.47	4.56	10.96	12.7	12.58	9.53	11.61	4.98	5.1	9.09	3.75	11.44	6.99	5.93	12.38	8.59	7.66	1.17	2.94	2.9		24	24	25	5	7	6	5	4	14	5	3
Peckoltia relictum	AUM 45538	30	36.05	15.93	12.95	3.13	5.03	3.47	6.65	1.3	6.34	9.48	8.51	8.31	10.12	7.35	8.43	12.51	3.48	8.33	9.61	9.59	6.7	8.54	4.26	4.09	7.78	2.17	9.96	5.92	5.02	8.75	6.75	8.14	0.97	2.73	2.65		24	24	24	5	7	6	5	4	14	5	3
Peckoltia relictum	AUM 45538	31	36	15.41	13.55	2.1	5.37	3.54	6.89	1.31	6.38	8.3	9.48	7.96	10.34	7.75	8.64	11.71	3.68	8.98	9.83	10.31	7.07	8.68	2.99	4.39	8.03	2.73	9.61	5.6	4.81	10.12	6.64	8.44	1.32	2.97	2.53		25	23	24	5	7	6	5	4	14	5	3
Peckoltia relictum	AUM 45538	32	33.97	15.16	12.95	2.58	4.85	3.17	6.11	1.55	6.33	9.02	8.31	8.23	9.65	6.35	7.71	11.49	3.89	8.45	9.96	8.34	7.01	9.09	2.64	3.65	7.98	2.6	8.9	4.24	5.09	7.97	6.42	7.38	1.15	2.77	2.96		23	23	24	5	7	6	5	4	14	5	3
Peckoltia relictum	AUM 45538	34	38.81	17.17	14.25	3.1	5.57	3.47	7.99	2.01	6.34	10.09	11.03	9.71	11.54	8.09	8.96	13.82	5.09	9.61	11.28	10.13	8.05	10.79	3.78	5.26	8.99	3.37	10.42	6.24	5.49	9.77	7.29	8.87	1.2	3.38	3.1		24	23	24	5	7	6	5	4	14	5	3
Peckoltia relictum	AUM 45538	35	32.64	14.74	12.35	1.99	4.76	3.25	6.38	1.34	5.02	8.68	8.65	7.27	8.15	6.35	7.68	12.35	3.61	8.36	9.23	8.89	6.8	8.9	3.05	3.44	7.32	2.66	9.03	5.58	4.28	7.93	6.71	7.83	0.94	2.79	2.56		22	22	24	5	7	6	5	4	14	5	3
Peckoltia relictum	AUM 45538	37	31.31	13.75	11.88	2.23	5.21	2.9	6.35	1.44	5.72	8.63	9.21	6.73	8.33	7.77	8.26	9.82	3.12	7.67	8.52	8.79	6.45	7.8	2.46	3.62	7.07	2.31	9.63	5.29	4.09	8.39	5.54	7.59	0.85	2.51	2.7		24	23	24	5	7	6	5	4	14	4	3
Peckoltia relictum	AUM 45538	43	28.51	11.67	10.11	2.44	4.54	2.79	5.66	1.07	4.15	7.29	6.86	5.86	6.57	5.92	5.52	9.62	3.1	6.52	8.05	6.36	5.61	6.66	2.92	3.15	6.6	2.44	7.44	4.42	3.42	7.27	5.11	5.74	0.52	1.81	2.39		22	21	23	5	7	6	5	4	14	5	3
Peckoltia relictum	AUM 45545	1	82.07	36.13	28.93	8.03	10.72	6.29	16.89	3.86	13.79	25.21	21.72	20.9	23.76	17.23	19.61	30.14	9.95	21.16	23.62	23.81	20.63	23.7	10.51	9.55	14.6	8.32	20.21	17.35	14.52	22.44	13.95	16.77	2.9	5.42	5.19		25	25	26	5	7	6	5	4	14	5	3
Peckoltia relictum	AUM 45545	2	69.39	30.24	23.99	6.57	8.96	5.65	12.82	3.05	11.48	20.97	17.58	18.06	19.47	15.38	15.86	25.51	10.92	17.05	20.99	19.36	16.31	20.52	6.88	8.25	15.45	7.77	18.64	13.55	12.02	20	12.98	13.2	2.62	4.41	4.72		25	24	26	5	7	6	5	4	14	5	3
Peckoltia relictum	AUM 45545	3	68.59	29.77	23.87	6.24	8.87	5.21	13.87	3.28	11.3	20.58	17.02	17.13	19.95	15.36	17.38	25.09	10.06	17.12	19.36	19.75	16.19	19.49	8.28	7.62	14.53	6.34	19.42	13.96	12.22	18.59	12.69	14.52	1.99	4.74	4.46		25	24	25	5	7	6	5	4	14	5	3
Peckoltia relictum	AUM 45545	6	59.39	24.77	20.05	4.93	7.02	4.53	11.43	2.6	9.83	16.69	15.21	15.16	15.76	12.74	13.48	20.23	7.58	14.11	16.91	15.19	13.86	16.23	7.53	7.15	13.03	5.44	14.56	10.51	8.89	15.78	10.08	10.28	1.96	4.28	4.07		25	24	25	5	7	6	5	4	14	5	3
Peckoltia relictum	AUM 45545	8	56.5	23.11	17.97	4.33	7.23	4.38	9.68	2.29	8.46	14.65	14	13.52	13.33	10.77	13.09	17.96	7.11	12.69	15.27	13.24	12.63	14.38	6.87	6.24	10.17	4.55	12.67	9.91	8.31	14.28	10.36	12.08	1.08	3.63	3.62		25	25	25	5	7	6	5	4	14	5	3
Peckoltia relictum	AUM 45588	1	71.85	30.85	24.55	6.6	8.34	5.58	14.3	3.25	10.85	21.81	18.88	16.76	21.24	16.71	17.57	24.55	10.25	17.14	21.23	20.51	17.18	19.54	8.9	8.82	14.4	7.37	18.34	14.52	13.06	19.2	10.8	13.63	3.29	5.15	4.28		25	25	26	5	7	6	5	4	14	5	3
Peckoltia relictum	AUM 45608	1	60.27	25.48	21.13	3.93	8.17	4.82	10.9	2.08	11.05	16.57	15.78	14.79	16.16	11.52	15.19	20.59	8.36	14.47	16.86	17.29	13.71	16.54	7.82	7.47	11.9	5.66	14.88	10.54	9.34	9.14	9.92	12.19	2.11	4.17	4.09		24	24	25	5	7	6	5	4	14	5	3
Peckoltia relictum	AUM 45609	2	60.62	25.94	21.56	4.7	7.78	5.24	11.58	2.29	10.85	16.77	15.78	14.65	17.67	14.16	14.65	22.53	8.02	15.45	17.38	16.79	12.46	17.36	7.01	6.8	13.65	5.44	15.67	11.89	9.77	17.47	10.14	11.58	2.19	4.63	3.86		26	26	26	5	7	6	5	4	14	5	3
Peckoltia relictum	AUM 45610	3	56.01	23.72	19.84	4.28	7.33	4.54	10.48	2.78	9.63	15.89	14.5	14.14	15.93	12.12	13.88	19.42	7.37	13.32	15.41	15.38	12.14	15.97	6.76	6.56	11.33	4.43	14.74	9.99	8.75	14.89	9.06	9.92	1.88	4.08	3.8		24	25	25	5	7	6	5	4	14	5	3
Peckoltia relictum	AUM 45611	4	53.44	22.19	18.71	4.14	6.54	4.28	9.23	1.63	9.35	14.62	14.43	13.42	13.98	11.62	13.81	17.52	6.66	12.88	15.17	13.71	12	14.64	6.37	6.62	10.78	4.94	12.68	10.18	8.58	13.75	8.92	11.19	1.78	3.62	3.63		25	25	25	5	7	6	5	4	14	6	3
Peckoltia relictum	AUM 45612	5	52.4	22.28	18.09	3.45	6.76	4.18	9.66	1.85	8.55	15.07	13.31	13.24	15.47	11.42	13.32	18.62	7.04	12.82	15.37	13.27	11.77	14.52	5.99	6.83	12.44	5.5	13.11	9.67	8.41	14.66	9.18	11.1	1.79	3.4	3.81		24	25	25	5	7	6	5	4	14	5	3
Peckoltia sabaji	AUM 35537	1	94.2	37.88	30.87	7.46	10.34	6.5	18.51	3.57	9.42	24.05	23.4	21.71	31.62	20.48	26.72	34.45	15.29	20.98	24.51	46.07	21.56	26.78	16.28	8.32	14.96	10.17	21.25	18.75	13.92	25.21	14.62	15.52	5.72	4.63	3.71	.	27	27	27	5	7	6	5	4	14	5	5
Peckoltia sabaji	AUM 35537	2	87.59	33.69	28.09	5.25	10.39	5.84	16.99	3.66	9.45	22.4	21.13	20.08	28.11	19.4	23.91	33.59	12.31	19.65	22.64	37.75	20.5	23.31	14	7.23	17.78	9.48	20.58	17.24	12.44	23.34	13.07	14.12	4.54	4.5	3.93	.	27	28	28	5	7	6	5	4	14	5	5
Peckoltia sabaji	AUM 35537	3	78.07	30.87	25.69	5.47	8.19	5.51	14.89	2.89	8	19.47	18.6	16.81	25.48	16.98	22.24	30.65	11.93	17.31	20.35	29.12	17.69	19.92	13.58	7.56	15	8.44	19.12	15.17	11.11	21.32	12.73	11.96	4.75	3.68	3.73	.	27	26	27	5	7	6	5	4	14	5	5
Peckoltia sabaji	AUM 35537	4	74.59	31.39	25.71	5.51	9.07	5.77	15.3	3.03	8.37	20.8	18.52	17.96	25.02	16.29	20.53	27.52	11.81	17.26	20.11	32.5	18.18	20.03	13.39	7.07	13.75	8.67	17.54	15.38	11.24	20.62	13.39	12.34	5.35	3.36	3.54	.	26	26	26	5	7	6	5	4	14	5	5
Peckoltia sabaji	AUM 35546	1	169.41	59.69	48.11	12.42	16.19	8.7	29.91	6.39	15.29	37.29	36.37	35.15	50.6	37.49	41.83	68.92		31.98	38.06	78.21	34.98	44.39	33.22	13.04	30.45	16.41	38.22	35.43	22.16	43.17	21.51	23.09	10.47	7.56	6.02	.	27	27	27	5	7	6	5	4	14	5	5
Peckoltia sabaji	AUM 35555	1	115.8	46.4	37.71	8	12.17	7.07	22.54	4.86	12.53	29.2	28	27.49	36.59	26.9	27.81	43.31	17.3	25.53	29.59	43.48	26.51	32.39	21.56	10.81	20.97	12.16	27.18	22.46	16.98	29.29	18.27	17.51	6.8	5.8	6.04	.	27	27	27	5	7	6	5	4	14	5	5
Peckoltia sabaji	AUM 35733	1	155.17	57.46	46.08	12.09	14.99	7.97	29.33	5.94	14.72	37.45	33.76	34.98	49.43	36.19	39.12	56.89	24.58	30.42	36.46	62.42	31.02	42.41	31.14	13.84	29.43	15.6	34.25	31.84	21.18	39.12	20.79	22.59	7.75	7.03	6.75	.	27	27	27	5	7	6	5	4	14	5	5
Peckoltia sabaji	AUM 35733	2	153.24	57.42	44.17	13.45	14.89	8.03	27.35	5.4	14.1	35.31	32.7	34.53	48.88	33.81	38	57.29	25.55	29.65	36.89	66.53	30.74	41.74	31.17	13.01	26.48	14.44	32.27	32.05	20.3	38.93	21.83	20.72	7.19	6.78	6.05	.	27	27	27	5	7	6	5	4	14	5	5
Peckoltia sabaji	AUM 35733	3	133.33	52.28	41.22	11.44	14.05	7.54	25.55	5.76	13.57	33.67	31.63	32.31	42.2	30.03	34.59	48.86	20.01	28.07	33.94	55.27	29.69	34.59	24.34	11.42	21.23	14.53	30.74	26.26	19.31	32.87	19.93	21.62	6.32	6	5.93	.	27	27	27	5	7	6	5	4	14	5	5
Peckoltia sabaji	AUM 35733	4	112.65	42.6	34.97	7.64	11.68	6.73	21.47	4.4	10.96	29.21	25.7	28.81	35.85	24.7	29.28	40.6	16.8	23.74	28.11	49.61	23.45	31.22	20.01	9.28	19.14	12.04	25.7	22.25	16.16	27.26	16.59	17.66	6.26	5.62	4.64	.	27	26	27	5	7	6	5	4	14	5	5
Peckoltia sabaji	AUM 35733	5	109.49	43.57	34.68	8.6	12.05	6.72	21.38	4.04	10.66	29.31	26.15	24.46	36.45	25.73	30.54	39.35	18.13	23.31	28.12	46.65	23.86	30.39	20.91	9.93	17.55	11.69	23.87	21.75	16.34	27.31	16.43	17.44	6.05	5	5.59	.	27	26	27	5	7	6	5	4	14	5	5
Peckoltia sabaji	AUM 38298	1	151.68	57.69	45.36	12.74	14.11	7.13	28.35	6.98	13.84	36.24	34.63	33.45	42.33	33.91	37.05	56.45	24.09	30.5	37.44	50.85	32.46	40.58	28.78	14.46	27.8	18.43	36.94	30.94	21.69	37.37	22.32	23.89	9.29	6.25	6.48	.	24	25	26	5	7	6	5	4	14	4	4
Peckoltia sabaji	AUM 38298	2	65.09	26.4	22.01	5.04	7.36	3.98	12.4	3.48	7.05	17.16	15.84	15.37	19.05	14.19	16.27	23.63	9.43	14.78	17.63	18.83	14.13	15.01	10	7.51	13.17	8.39	17.35	12.42	8.86	17.64	11.13	11.71	3.38	3.19	3.05	.	24	24	24	5	7	6	5	4	14	4	4
Peckoltia sabaji	AUM 39312	1	113.33	49.02	40.77	9.84	13.36	7.24	22.97	4.21	16.33	27.87	28.95	27.1	35.76	25.45	29.15	41.17	16.97	23.91	29.3	37.08	23.1	28.97	21.94	12.09	18.08	11.61	27.56	20.29	16.08	26.98	17.7	16.62	6.62	5.47	5.3	.	25	25	25		7	5	4	3	14
Peckoltia sabaji	AUM 39312	3	104.49	45.3	34.43	11.48	12.78	6.83	21.78	4.57	16.44	27.75	26.38	25.5	31.92	23.1	30.51	36.56	15.46	23.3	28.92	31.84	22.86	24.63	19.88	11.11	20.6	12.63	25.94	18.06	15.11	22.4	16.17	13.7	5.24	5.17	4.77	.	25	25	25		7	5	4	3	14
Peckoltia sabaji	AUM 39312	4	94.1	39.61	32.1	8.4	11.81	5.84	19.34	3.97	14.52	24.31	24.78	20.98	31.41	21.07	24.27	30.08	13.56	20.48	24.55	32.93	19.72	24.37	15.92	9.7	17.02	11.89	24.52	15.25	13.41	20.32	15.34	13.48	4.55	5.02	4.47	.	25	25	25		7	5	4	3	14
Peckoltia sabaji	AUM 39312	5	91.32	40.11	31.08	9.41	11.48	6.12	19	4.53	15.38	24.85	25.21	21.48	26.81	21.64	23.16	32.53	13.66	19.2	24.24	28.97	19.58	22.73	15.86	9.55	17.57	10.83	23.49	15.34	13.01	22.58	15.17	13.84	3.86	4.49	5.05	.	25	25	25		7	5	4	3	14
Peckoltia sabaji	AUM 39312	6	80.77	34.19	28.52	6.59	10.59	5.88	16.69	3.13	13.29	22.45	21.9	19.34	25.79	18.01	21.16	28.09	11.32	18.72	21.28	21.31	19.38	19.42	12.95	8.46	16.34	10.28	20.27	13.57	11.61	20.17	13.12	11.11	3.96	4.79	4.01	.	25	25	25		7	5	4	3	14
Peckoltia sabaji	AUM 39312	7	76.86	32.78	25.9	5.62	10.19	4.99	15.07	2.98	12.07	19.84	19.7	18.12	23.96	15.84	19.58	26.06	10.81	17.97	21.94	24.37	15.94	18.45	11.47	7.71	16.45	9.49	19.54	12.01	10.42	17.54	13.66	11.13	3.43	4	3.84	.	25	25	25		7	5	4	3	14
Peckoltia sabaji	AUM 39312	8	69.3	30.79	25.05	6.15	9.29	4.6	14.43	3.15	12.46	19.68	18.5	15.17	21.74	16.17	18.35	23.55	10.01	16.31	20.49	24.84	14.4	16.17	11.6	6.78	13.37	8.51	16.77	10.27	10.13	14.11	11.46	10.41	3.2	3.49	3.91	.	25	25	25		7	5	4	3	14
Peckoltia sabaji	AUM 39312		84.29	34.55	29.19	5.52	10.69	5.54	17.05	3.44	12.99	22.3	22.58	19.58	25.75	18.03	20.34	28.22	11.66	18.37	21.14		17.94	20.08	13.98	8.8	14.59	9.24	19.33	13.87	11.64	17.95	13.21	12.7	3.53	4.71	4.06	.	25	25	25		7	5	4	3	14
Peckoltia sabaji	AUM 39312		77.6	30.97	26.35	4.98	9.44	5.06	15.17	3.7	11.92	20.86	20.95	19.48	24.35	16.74	19.63	25.2	12.17	17.24	19.93	22.33	15.27	17.67	10.51	8.09	16.29	8.79	19.56	12.03	10.81	17.14	12.53	12	3.75	4.33	3.85	.	25	25	25		7	5	4	3	14
Peckoltia sabaji	AUM 39588	1	99.42	40.51	33.91	6.65	11.31	6.12	19.96	3.88		25.54	23.94	19.92	32.35	21.59	29.74	34.74	15.49	21.35	24.63	35.6	18.62	24.45	17.2	10.74	22.85	9.67	23.39	15.32	14.13	23.11	14.77	14.11	5.97	4.97	4.97	.	25	25	25	5	7	6	5	4	14
Peckoltia sabaji	AUM 39588	2	99.74	41.46	32.74	7.82	11.43	6.97	20.39	4.47	15.31	25.51	25.38	17.62	33.47	21.68	25.36	37.72	14.15	21.93	25.29	33.96	19.36	24.63	14.81	9.54	20.89	9.72	25.48	16.81	14.14	23.51	16.22	13.58	6.28	5.17	4.74	.	25	25	25	5	7	6	5	4	14
Peckoltia sabaji	AUM 39588	3	100.62	40.3	32.33	7.42	10.95	7.03	18.73	4.18		25.7	24.71	21.38	33.18	23.74	27.14	34.99	15.33	21.37	24.64	35.3	19.66	26.33	19.1	10.88	20.76	9.99	22	18.82	13.63		14.22	13.01	6.5	4.92	4.39	.	23	24	26	5	7	6	5	4	14
Peckoltia sabaji	AUM 39588	4	92.84		31.31	9.24	10.87	7.1	19.02	4.38		24.25	22.83	19.37	30.37	22.31	25.46	32.28	13.82	20.03	24.51		19.4	23.73	16.19	9.79	17.59	8.62	21.67	15.36	13.38	19.06	13.13	12.42	3.88	4.82	5.27	.	25	25	25	5	7	6	5	4	14
Peckoltia sabaji	AUM 39588	5	93.21	37.14	31	6.99	10.71	6.24		3.94		23.94	22.48	21.87	31.37	23.4	25.94	31.69	14.02	19.14	21.74	32.55	17.65	23.25	12.41	9.82	19.94	9.42	22.56		13.25	20.52	14.72	13.13	5.17	3.31	4.91	.	25	25	25	5	7	6	5	4	14
Peckoltia sabaji	AUM 39588	6	95.09	38.72	31.39	6.73	11.67	6.24	18.78	3.89	14.39	24.76	21.89	21.74	33.64	22.56	25.99	32.28	15.4	20.48	24.61	33.58	19.14	23.85	15.52	10.4	18.88	9.93	24.24	15.85	14.46	24.35	14.05	12.2	4.32	4.17	4.59	.	25	25	25	5	7	6	5	4	14
Peckoltia sabaji	AUM 39588	7	94.06	38.75	32.02	7.76	11.03	6.74	18.05	3.78	12.77	24.32	22.68	19.72	30.22	21.71	25.6	32.51	12.47	20.01	22.22	27.47	17.43	22.36	15.12	9.37	18.03	8.55	21.03	14.07	13.05	18.96	13.89	12.49	5.37	5.33	4.12	.	25	25	25	5	7	6	5	4	14
Peckoltia sabaji	AUM 39588	8	90.66		29.41	6.97	9.53	6.16	17.42	3.47	13.21	23.06	21.89	20.21	29.44	20.77	24	32.46	13.64	18.62	23.8	32.32	18.11	23.35	16.14	10.58	20.51	8.6	22.58	15	13.19	17.04	13.84	11.55	4.82	4.85	3.8	.	25	25	25	5	7	6	5	4	14
Peckoltia sabaji	AUM 39588	9	101.23	40.15	31.73	7.91	11.07	6.7	18.89	3.86		24.75	21.58	20.83	31.12	20.89	24.6	35.57	14.31	20.64	25.23	34.17	17.94	24.01	14	11.03	21.75	9.35	24.09	13.9	13.18	20.01	14.28	12.62	4.81	3.85	4.78	.	25	25	25	5	7	6	5	4	14
Peckoltia sabaji	AUM 39588	10	87.65	37.12	29.77	7.04	11.2	6.23	17.3	3.25		22.81	22.73	21.71	28.52	21.01	24.47	29.25	13.84	19.01	22.83	30.45	16.94	21.46	15.99	8.66	16.61	8.54	19.84	15.15	12.82	20.01	13.92	12.28	4.75	3.62	4.2	.	25	25	25	5	7	6	5	4	14
Peckoltia sabaji	AUM 39588	11	82.25	32.46	26.68	5.61	9.75	6.07	16.19	3.63		20.52	19.67	15.4	25.8	17	21.66	28.77	11.1	17.13	19.1	26.48	16.22	20.43	13.62	9.54	18.37	8.54	20.47	12.63	11.48	17.8	12.15	10.54	4.03	3.41	4.27	.	25	25	25	5	7	6	5	4	14
Peckoltia sabaji	AUM 39588	12	78.59	33.45	27.21	8.18	9.84	5.89	16.71	3.67		21.64	18.83	17.35	26.85	18.27	22.85	27.83	10.56	17.97	20.96	26.07	14.95	19.89	15.12	9.57	15.87	8.84	20.61	14.64	11.83	17.22	13.07	10.81	4.36	4	5.21	.	25	25	25	5	7	6	5	4	14
Peckoltia sabaji	AUM 39588	13	87.79	36.14	28.88	7.19	10.71	6.23	17.2	3.55		22.63	21.03	18.77	29.57	18.18	23.82	30.17	13.67	18.87	22.35	32.54	17.33	23.16	17.04	10.42	18.68	9.16	22.4	14.5	11.61	19.23	13.82	12.13	4.6	4.19	6.1	.	25	25	25	5	7	6	5	4	14
Peckoltia sabaji	AUM 39588	14	79.82	32.26	26.95	4.77	9.85	5.77	15.69	3.39		21.64	19.23	16.19	24.84	18.35	22.47	28.5	11.13	17.95	19.96	25.85	18.63	20.32	12.29	10.36	18.84	7.51	18.4	12.15	11.66	16.39	12.48	10.46	4.56	3.61	4.33	.	25	25	25	5	7	6	5	4	14
Peckoltia sabaji	AUM 39588	15	78.75	32.44	26.42	5.47	9.94	5.62	16.27	3.11		20.28	18.24	16.37	23.78	17.9	20.31	27.9	11.51	19.03	21.91	25.68	14.4	19.81	12.78	9.08	17.71	8.55	20.27	12.99	12.29	18.13	12.67	10.11	3.56	3.46	4.09	.	25	25	25	5	7	6	5	4	14
Peckoltia sabaji	AUM 39588	16	79.92	33.53	27.6	6.24	9.46	5.41	15.69	3.23	13.18	21.58	20.92	20.02	26.19	18.26	21.12	28.08	10.82	17.89	20.71		13.89	16.99	13.79	8.53	16.5	7.97	20.09	12.51	15.27	15.59	12.86	9.6	3.54	3.82	4.42	.	25	25	25	5	7	6	5	4	14
Peckoltia sabaji	AUM 39588	17	72.68	30.84	26.19	5.33	9	4.97	14.48	3.35	11.53	19.81	17.27	16.13	22.92	15.73	19.78	23.7	9.87	16.74	19.88	25.86	14.2	17.96	13.17	8.02	14.08	7.58	19.59	10.93	11.16	14.37	10.69	9.04	4.06	3.23	3.34	.	25	25	25	5	7	6	5	4	14
Peckoltia sabaji	MCNG 20164	1	197.7	73.21	58.68	15.98	19.64	9.64	36.18	7.52	19.18	43.92	45.09	43.08	60.65	43.95	47.44	81	32.2	37.97	45.07	69.31	43.53	60.76	35.9	16.48	34.71	18.99	42.41	43.83	26.02	53.41	26.53	27.15	11.26	6.11	7.68	.	27	27	27	5	7	6	5	4	14	5	5
Peckoltia sabaji	MCNG 37043	1	149	54.36	44.83	10.01	15.42	8.2	27.29	5.77	13.98	32.52	35.63	31.76	41.8	34.09	33.91	55.73	21.29	28.4	34.15	47.55	28.02	37.71	28.63	12.94	26.49	13.17	34.54	27.6	19.48	33.12	21.12	21.12		5.06	5.99	.	28	28	28	5	7	6	5	4	14	5	5
Peckoltia sabaji	MCNG 37043	2	116.3	47.21	38.14	9.12	12.56	7.82	22.41	4.77	11.91	29.41	29.54	26.47	33.08	28.08	28.17	41.5	17.93	24.86	29.52	37.35	24.26	29.12	21.91	9.47	22.63	10.91	27.55	20.31	17.14	28.36	17.59	17.06	6.88	4.77	6.1	.	27	26	27	5	7	6	5	4	14	7	6
Peckoltia sabaji	MCP 15157	1	111.01	44.92	35.83	8.27		6.67	21.01	4.64	15.39	29.26	24.36	25.41	37.43	25.79	30.39	42.02	18.43		28.83	42.32	23.63	29.99	17.68	11.96	22.77	11.7	27.06	22.18	16.1	29.95	16.36	15.33	5.99	5.76	6.54	.	25	25	25	5	7	6	5	4	14
Peckoltia sabaji	MCP 15157	2	113.54	43.31	35.46	8.28	12.59	6.18	19.98	4.66	14.61	27.48		24.98	37.2	24.81	28.11	49.07	16.52	23.32	27.27	39.54	22.26	28.83	18.17	13.15	24.41	10.71	27.69	21.96	16.06	26.43	16.89	16.08	8.22	5.91	5.76	.	25	25	25	5	7	6	5	4	14
Peckoltia sabaji	MCP 15157	4	102.1	41.09	32.79	9	10.1	6.41	18.86	3.66	14.49	25.86	22.99	22.3	35.26	22.59	26.55	38.05	16.46	22.49	25.62	38.42	19.64	29.96	14.56	11.39	19.96	11.71	23.74	17.88	14.14	23.49	15.85	15.01	5.86	4.75	5.81	.	25	25	25	5	7	6	5	4	14
Peckoltia sabaji	MCP 15157	5	95.28	37.43	30.46	6.62	9.48	5.98	17.98	3.4	14	25.14	23.46	20.59	31.75	22.31	25.06	28.38	14.6	19.71	23.53	36.92	16.69	23.92	13.17	9.88	19.52	9.17	22.52	16.12	12.93	21.37	12.54	13.59	5.51	4.34	4.94	.	24	24	25	5	7	6	5	4	14
Peckoltia sabaji	MCP 15189	1	127.74	49.04	39.37	10.11	13.24	7.56	24.15	5.14	17.26	31.46	27.61	29.96	39.07	28.84	32.49	48.37	20.19	27.57	33.1	52.72	28.23	37.21	20.47	11.88	22.51	13.48	29.34	26.09	16.76	33.77	17.91	18.07	6.99	5.98	7.01	.	26	25	27	5	7	6	5	4	14	5	4
Peckoltia sabaji	MCP 30025	1	125.95	47.4	38.18	8.55	11.44	7.24	22.68	5.16	16.34	30.88	29.78	26.55	40.07	28.24	33.4	43.13	16.17	24.31	28.19	48.1	23.16	32.27	22.09	12.74	24.25	11.09	30.14	21.72	17.09	23.12	15.71	18.44	6.4	6.15	5.78	.	25	25	25	5	7	6	5	4	14
Peckoltia sabaji	MZUSP 24997	1	141.99	55.62	43.43	12.36	14.89	8.16	25.93	5.77	20.24	37.19	33.42	32.93	43.66	33.36	35.97	52.18	21.25	30.36	37.69	52.5	32.51	40.45	27.57	10.44	21.26	14.78	30.25	29.89	21.39	37.38	21.21	21.11	7.51	6.31	6.85	.	28	26	27	5	7	6	5	4	14	5	5
Peckoltia sabaji	MZUSP 24997	2	137.71	54.61	43.2	12.38	15.32	7.71	26.08	6.4	19.63	36.17	30.76	31.26	42.44	33.32	37.63	49.04	21.93	30.18	36.61	53.99	30.3	40.49	26.96	11.25	21.16	14.69	29.08	29.27	20.52	38.48	20.14	19.63	7.7	6.08	6.21	.	27	27	27	5	7	6	5	4	14	4	4
Peckoltia sp.	MCP 29648	1	110.03	50.37	42.34	7.77	14.92	8.46	26.82	6.4	19.82	30.68	33.14	24.43	30.25	25.86	28.47	35.34	16.22	29.67	33.49		27.94	32.42	12.07	12.85	19.48	13.39	24.81	19.41	18.39	30.49	18.45	19.05	8.89	5.6	6.17		25	23	24	5	7	6	5	4	12	4	4
Peckoltia vermiculata	NMW 48056	1	107.93	43.4	36.19	7.08	13.88	7.3	22.36	5.4	15.11	31.8	27.49	26.68	30.84	22.19	27.37	36.88	15.62	27.36	30.39	35.1	27.4	29.65	18.21	9.9	16.94	12.69	24.88	22.26	19.6	26.8	13.63	14.84	7.28	4.15	4.04		26	25	25	5	7	6	5	4	14	5	5
Peckoltia vermiculata	NMW 48059	1	74.65	30.66	26	4.9	10.13	5.67	14.54	4	9.92	21.68	20.42	17.81	21.74	15.27	16.75	25.29	12.13	18.33	20.86	23.57	18.09	18.57	12.58	7.17	11.41	8.69	17.1	14.29	12.02	18.81	11.53	10.43	6.37	2.93	3.26		25	24	25	5	7	6	5	4	14	5	4
Peckoltia vermiculata	NMW 48064	1	94.93	38.54	31.6	7.46	11.68	6.77	19.11	5.18	12.93	27.47	24.63	20.11	28.15	20.99	23.27	33.77	14.79	23.47	26.75		22.63	23.98	14.76	9.03	16.16	11.51	22.27	19.16	15.64	25.2	13.11	13.62	4.32	3.39	4.01		26	25	25	5	7	6	5	4	14	5	4
Peckoltia vittata	CU 76567	1	107.31	46.55	37.38	9.63	13.38	7.23	22.49	5.24	13.89	33.87	28.47	22.79	31.8	24.48	28.72	38.05	17.15	28.25	32.58		27.98	27.49	17.65	11.25	17.88	15.03	26.39	23.33	19.64	26.14	16.33	16.11	5.55	4.12	3.81		24	22	24	5	7	6	5	4	14	4	4
Peckoltia vittata	FMNH 107073	1	71.64	32.88	26.21	7.05	10.08	4.78	16.39	4.24	12.11	23.55	20.49	19.34	23	17.24	18.61	20.8	10.23	20.42	23.84	24.3	21.17	18.2	12.56	7.51	11.55	10	15.7	13.63	13.76	20.16	12.81	12.82	4.6	3.43	3.36		23	22	21	5	7	6	5	4	14	4	4
Peckoltia vittata	FMNH 107073	2	69.53	30.83	25.45	6.09	9.61	4.82	15.28	4.31	12.33	22.51	20.27	17.41	23.55	17.09	19.84	20.72	10.87	18.78	21.4	24.23	19.42	18.59	10.81	8.37	12.92	10.34	16.89	12.5	12.6	18.53	11.95	12.1	4.76	3.25	2.77		23	23	23	5	7	6	5	4	14	4	4
Peckoltia vittata	FMNH 107074	1	85.17	38.15	31.27	6.85	11.55	5.22	19.28	5.11	14	28.5	24.4	20.88	26.83	19.85	22.44	28.65	12.64	23.37	26.91	28.34	24.57	22.41	10.92	9.63	16.14	12.65	20.12	16.59	15.42	24.93	14.09	13.63	6.28	3.86	3.88		25	23	24	5	7	6	5	4	14	4	4
Peckoltia vittata	FMNH 59717	1	53.11	24.23	20.47	3.49	7.65	3.99	11.35	3.76	8.64	15.59	15.37	13.65	16.82	11.58	15.4	18.76	8.42	14.59	16.08	19.56	12.51	12.97	7.38	6.9	11.55	6.37	12.36	11.31	9.6	14.22	8.89	7.61	2.69				25	24	24	5	7	6	5	4	14	4	4
Peckoltia vittata	FMNH 59717	2	85.58	38.34	32.16	5.9	11.48	5.81	20.09	5.68	13.79	25.04	23.71	19.78	26.46	21.32	25.04	27.71	15.41	23.67	26.88	34.53	26.51	23.09	11.32	11.35	16.95	11.24	23.54	17.59	17.25	27.15	15.94	13.48	3.75	4.01	3.47		25	24	24	5	7	6	5	4	14	4	4
Peckoltia vittata	FMNH 59717	3	91.54	38.99	32.3	6.65	12.07	5.54	19.59	5.72	15.36	26.66	24.19	23.11	27.94	20.91	25.04	29.45	14.56	24.56	27.76	33.43	25.39	27.09	14.31	11.16	19.04	11.76	23.28	19.34	17.84	29.19	14.44	13.96	5.07	3.52	3.78		25	24	25	5	7	6	5	4	14	4	4
Peckoltia vittata	FMNH 59718	1	93.58	43.31	35.42	9.02	12.44	5.13	21.69	5.33	14.16	25.72	28.36	16.41	28.7	21.65	24.37	33.59	18.26	23.6	27.68	34.81	22	21.68	12.55	10.7	19.07	9.71	23.3	19.04	15.07	27.79	16.98	15.85	6.63		3.94		24	24	25	5	7	6	5	4	14	4	4
Peckoltia vittata	FMNH 59718	2	89.91	38.03	32.27	6.02	11.45	5.15	19.82	5.58	12.3	23.87	25.79	19.59	26.75	20.42	23.81	30.59	13.92	21.38	24.47	35.77	19.36	23.86	9.39	11.29	19.98	10.23	23.41	16.99	13.59	23.21	16.43	14.07	5.85	3.59	3.69		26	25	25	5	7	6	5	4	14	4	4
Peckoltia vittata	FMNH 59718	3	94.63	40.53	33.12	7.5	11.76	5.27	20.57	5.9	12.98	25.2	27.16	20.83	27.97	22	23.77	31.12	14.58	22.72	25.73		25.7	23.2	10.87	9.74	22.27	10	24.47	16	14.29	25.69	18.43	13.44	6.75	4.07	4.26		26	25	26	5	7	6	5	4	14	4	4
Peckoltia vittata	FMNH 59718	4	100.16	45.41	36.58	8.91	13.2	4.96	22.36	6.51	13.87	26.89	28.99	22.21	29.82	21.73	27.12	33.82	15.41	25.42	29.85	33.53	22.21	26.22	11.89	10.87	20.4	11.1	24.48	18.11	14.54	26.87	17.81	18.07	7.99	4.46	4.87		25	25	25	5	7	6	5	4	14	4	4
Peckoltia vittata	MCP 21972	1	77.97	34.83	27.93	6.64	10.26	6.32	16.93	3.61	13.65	21.95	21.13	15.98	25.32	18.19	21.61	27.49	12.48	19.43	21.73		18.96	20.47	12.69	8.02	12	8.63	18.23	14.8	12.4	19.65	14.05	13.97	4.15	4.28	4.89		26	25	25	5	7	6	5	4	14	5	5
Peckoltia vittata	MCP 30027	16	60.73	25.93	21.73	4.91	8.63	5.19	11.55	2.97	10.14	17.44	16.7	15.68	20.56	13.45	17.95	21.81	10.06	15.67	17.94	22.74	14.69	16.25	9.19	6.22	10.79	8.97	15.48	11.65	9.48	13.54	10.76	11.13	2.36	2.82	2.64		24	23	24	5	7	6	5	4	14	5	3
Peckoltia vittata	MCP 30027	18	60.61	27.73	23.69	5.09	8.93	5.46	12.86	3.25	10.26	17.1	17.83	15.02	20.45	13.7	17.45	20.81	9.87	16.11	18.56	22.1	15.26	15.27	9.35	6.16	11.47	8.49	15.34	12.07	9.86	14.32	11.81	10.4	4.2	2.79	3.15		25	23	24	5	7	6	5	4	14	5	3
Peckoltia vittata	MCP 30027	351.02	67.96	29.71	24.9	4.96	9.82	5.59	13.21	3.25	11.25	18.19	18.73	16.33	22.97	16.16	18.26	23.24	9.82	16.92	19.43	24.46	15.27	18.6	9.68	7.29	11.94	9.24	16.39	12.48	10.81	16.07	11.84	10.74	4.03	2.79	3.29		25	23	25	5	7	6	5	4	14	5	3
Peckoltia vittata	MNRJ 15619	1	77.86	35.14	29.97	5.58	10.48	6.13	17.51	4.59	13.33	25.73	23.55	18.55	25.14	18.17	20.33	24.58	12.46	21.13	23.17	21.29	21.65	20.98	12.48	6.87	10.45	10.26	17.63	14.43	12.84	22.24	14.91	13.69	4.07	4.63	4.76		25	24	25	5	7	6	5	4	14	5	4
Peckoltia vittata	MNRJ 15619	2	76.68	35.44	30.9	5.42	10.26	6.11	17.53	4.34	13.51	24.89	22.76	16.36	26.15	18.82	21.64	24.28	13.34	20.86	23.53	27.05	20.77	21.07	11.37	7.22	11.72	10.07	17.98	14.36	13.07	21.67	15.07	14.25	5.47	4.98	4.5		25	24	25	5	7	6	5	4	14	5	4
Peckoltia vittata	MNRJ 19374	1	51.82	23.21	19.88	1.97	8.18	4.11	11.16	2.69	8.33	14.27	14.16	14.34	15.54	11.16	13.24	16.29	6.86	14.05	15	16.96	13.95	15.28	6.01	5.5	8.95	6.44	11.09	9.49	9.09	13.75	8.49	8.08	2.26	1.45	2.07		23	24	23	5	7	6	5	4	14	4	4
Peckoltia vittata	MNRJ 19374	2	49	21.83	18.56	3.79	7.73	3.99	10.41	2.56	7.55	13.95	13.64	11.68	16.02	11.14	11.92	15.2	7.69	12.58	13.5	14.93	12.07	13.51	4.13	5.85	7.83	6.61	12.88	8.72	8.47	13.83	7.58	7.97	3.29	2.41	2.24		23	24	24	5	7	6	5	4		4	4
Peckoltia vittata	MNRJ 19374	3	44.58	19.51	16.54	2.93	7.11	3.03	8.69	2.66	7.03	12.42	12.25	11.5	14.77	9.76	12.02	14.78	6.45	11.5	11.66	14.87	10.48	12.95	4.5	4.96	8.23	5.7	9.71	9.38	7.42	11.94	7.55	7.84	1.72	2	1.84		24	23	23	5	7	6	5	4	14	4	4
Peckoltia vittata	MNRJ 20973	1	104.34	46.18	37.71	8.86	14.02	7.5	22.52	6.3	19.53	32.28	28.31	22.32	30.8	23.69	27.09	31.68	17.4	26.88	31.31	35.18	28.51	28.31	20.51	8.19	15.35	12.17	21.81	21.11	20.28	28.18	17.61	15.66	7.1	3.79	4.79		26	25	25	5	7	6	5	4	14	5	4
Peckoltia vittata	MNRJ 20973	2	82.54	37.2	30.77	6.93	12.55	6.1	17.76	4.98	16.35	26.77	24.13	18.57	26.29	19.05	22.29	27.3	12.09	22.96	25.7		22.06	22.12	13.39	8.41	13.15	10.54	19.47	16.5	14.61	21.46	13.51	11.43	5.64	3.75	3.21		26	25	25	5	7	6	5	4	14	5	4
Peckoltia vittata	MNRJ 20973	3	76.87	34.06	28.14	5.72	11.38	5.64	17.24	5.23	15.76	26.18	20.52	16.83	24.79	17.38		25.84	12.91	21.53	24.4	30.18	21.64	21.62	12.42	7.1	12.62	10.67	18.36	17.07	14.71	20.6	11.62	12.3	5.7	2.81	3.83		26	24	25	5	7	6	5	4	14	4	5
Peckoltia vittata	MNRJ 20973	4	73.82	32.84	26.86	5.92	11.04	5.19	15.6	4.61	14.13	22.95	20.82	15.74	24.27	18.08	19.49	25.28	10.37	19.81	22.32	27.04	19.28	20.32	13.73	6.48	10.88	9.03	16.16	15.01	13.44	18.47	11.98	11.15	5.49	3.33	2.91		25	26	25	5	7	6	5	4	14	5	4
Peckoltia vittata	MNRJ 20973	5	63.44	28.74	24.68	4.37	9.48	5.25	13.57	3.58	12.99	20.69	18.84	14.92	20.74	15.11	18.55	21.42	10.95	18.06	20.58	22.74	18.18	16.95	10.7	7.39	10.01	8.01	14.54	13.57	12.5	17.09	10.76	10.26	2.69	2.96	3.1		26	24	25	5	7	6	5	4	14	5	3
Peckoltia vittata	MNRJ 20973	6	86.59	40.63	32.8	7.62	13.09	6.43	19.87	4.05	17.7	28.45	24.68	20.91	29.18	21.31	24.5	27.52	13.96	24.32	28.55	28.4	24.98	24.35	16.05	8.71	11.48	11.16	18.98	18.5	16.7	24.81	15.33	13.25	5.81	4.29	3.52		26	24	25	5	7	6	5	4	14	4	4
Peckoltia vittata	MNRJ 20973	7	88.8	40.62	33.5	7.57	13.23	6.52	20.55	5.29	18.7	29.88	25.63	18.68	28.39	21.21	23.11	28.74	15.56	25.31	28.94		26.24	25.66	16.45	7.59	12.1	11.24	18.44	18.82	17.43	25.15	15.03	12.92	7.43	4.19	4.39		25	25	25	5	7	6	5	4	14	4	4
Peckoltia vittata	MNRJ 20973	8	87.6	38.28	31.84	6.65	12.52	6.47	18.93	5.58	16.46	26.54	24.41	19.15	25.96	19.36	22.67	29.27	13.71	22.78	25.57	28.32	22.74	23.2	16.1	8.58	14.12	10.59	19.69	17.73	16.31	22.11	13.29	11.77	5.87	3.89	4.04		25	25	24	5	7	6	5	4	14	5	4
Peckoltia vittata	MNRJ 20973	9	84.32	37.39	31.56	6.21	12.26	6.02	18.66	4.68	16.26	26.71	23.98	19.05	26.69	19.03	22.41	27.92	12.64	23.35	26.96	31.14	24.66	23.02	16.3	7.94	14.82	10.5	20.09	17.1	16.59	23.79	14.02	12.81	5.51	3.83	3.48		25	25	26	5	7	6	5	4	14	5	5
Peckoltia vittata	MNRJ 20973	10	73.63	33.63	28.02	5.46	10.89	5.45	16.51	4.09	15.81	24.85	22.1	15.54	25.03	18.43	20.51	23.47	10.59	21.21	23.97		20.35	20.25	13.13	6.39	10.37	10.33	16.58	15.91	13.96	20.52	12.38	11.24	4.45	3.29	3.74		26	25	25	5	7	6	5	4	14	5	5
Peckoltia vittata	MNRJ 20990	1	70.95	29.71	25.74	4.33	10.23	5.46	14.86	4.17	13.35	22.26	20.66	19.37	21.97	15.04	18.75	23.16	11.01	18.82	20.91		20.42	19.36	11.4	6.77	10.65	8.99	16.67	14.38	12.71	19.17	11.04	10.81	4.7	3.68	2.94		25	26	26	5	7	6	5	4	14	5	5
Peckoltia vittata	MZUSP 23988	1	100.34	43.87	36.36	7.37	13.78	7.65	21.62	4.33	18.65	30.99	28.71	20.81	30.95	24.27	27.2	34.33	17.3	27.09	30.96	34.88	27.61	28.12	17.37	9.51	14.78	12.46	21.78	21.14	18.06	29.8	15.83	14.87	5.42	3.68	3.8		25	24	24	5	7	6	5	4	14	4	4
Peckoltia vittata	MZUSP 23999	1	100.5	43.34	35.25	8.8	13.88	6.91	20.54	5.02	17.63	29.65	26.22	22.32	30.49	23.26	26.26	34.97	14.31	25.85	30.22	32.51	28.36	29.42	17.4	8.88	17.45	12.96	24.44	21.46	18.4	30.95	16.65	14.62	5.79	3.34	4.47		25	25	25	5	7	6	5	4	14	5	5
Peckoltia vittata	MZUSP 23999	2	96.5	39.26	31.81	7.48	12.4	7.17	19.25	5.42	17.82	29.82	27.74	23.07	29.68	23.82	25.85	34.07	15.03	25.62	28.22	33.74	28.16	26.24	17.5	8.27	16.61	12.75	21.66	21.39	18.62	27.89	16.34	15.96	5.18	4.43	3.82		25	24	25	5	7	6	5	4	14	5	4
Peckoltia vittata	MZUSP 23999	3	103.02	46.3	37.11	10.63	14.12	7.12	21.6	5.28	19.82	33.12	27.95	23.94	33.57	25.19	26.97	32.66	17.13	27.14	31.77	35.9	28.12	31.36	18.25	10.32	16.36	12.67	24.15	22.13	19.27	30.75	16.39	16.04	7.12	4.65	4.43		25	25	25	5	7	6	5	4	14	5	4
Peckoltia vittata	MZUSP 23999	4	93.51	40.66	33.1	7.41	12.66	6.74	19.3	4.48	17.2	29.83	25.07	20.88	29.82	22.37	24.57	33.82	15.74	25.07	28.95		28.1	27.9	18.61	9.45	14.01	12.71	20.58	21.78	18.41	28.24	15.68	12.65	4.96	4.12	3.34		25	24	24	5	7	6	5	4	14	4	4
Peckoltia vittata	MZUSP 23999	5	85.28	37.22	30.7	6.37	11.57	6.44	17.89	3.86	15.4	26.64	24.34	19.88	28.78	19.51	23.62	29.33	15.35	22.94	26.44	30.21	23.52	24.02	15.04	9.76	14.37	12.06	20.76	18.92	16.18	25.03	13.88	12.71	6.39	3.96	3.65		24	24	25	5	7	6	5	4	14	4	5
Peckoltia vittata	MZUSP 23999	6	86.8	35.74	29.71	5.7	11.5	6.7	16.98	4.38	15.55	27.07	23.39	20.79	27.06	20.56	23.36	31.69	13.94	22.27	25.85	31	24.45	24.72	14.43	8.19	14.33	11.08	19.74	19.47	15.97	24.81	13.91	12.02	4.62	2.6	3.56		25	24	24	5	7	6	5	4	14	5	4
Peckoltia vittata	MZUSP 24122	1	74.65	32.97	27.72	4.75	10.83	6.36	15.92	3.78	13.94	23.52	21.22	17.97	24.14	18.3	20.72	24.89	13.48	19.64	22.24	25.55	19.05	21.2	11.51	6.85	11.35	9.51	15.1	15.58	12.92	21.09	14.22	13.08	6.25	3.23	3.77		25	24	24	5	7	6	5	4	14	5	4
Peckoltia vittata	MZUSP 24122	2	70.39	31.02	25.97	5.66	9.79	5.63	15.02	3.27	12.63	22.51	20.42	16.54	22.88	16.1	20.03	23.03	9.8	18.69	21.17	24.69	19.42	19.23	11.37	6.91	10.83	8.87	15.8	14.2	12.36	20.48	12.87	12.05	6.35	3.74	3.66		25	25	24	5	7	6	5	4	14	5	4
Peckoltia vittata	MZUSP 24122	3	74.91	30.73	26.88	3.92	10.27	5.66	15.58	4.35	13.02	22.59	21.18	18.35	23.28	17.24	19.44	24.12	11.41	19.07	20.93	25.78	19.96	20.28	12.75	6.35	11.32	9.15	16.19	15.23	13.26	20.93	13.9	11.41	5.13	3.33	3.53		25	24	24	5	7	6	5	4	14	5	5
Peckoltia vittata	MZUSP 24122	4	77.33	33.63	28.02	5.92	10.58	6.13	16.57	4.56	14.35	24.17	20.24	17.42	24.29	17.93	20.16	24.71	10.35	20.49	23.06	25.63	19.73	21.65	12.56	7.1	11.03	9.68	16.48	16	13.38	20.87	13.71	12.75	5.59	4.38	3.72		25	25	25	5	7	6	5	4	14	4	4
Peckoltia vittata	MZUSP 24122	5	71.45	31.74	26.47	4.62	10.23	6.06	15.35	3.5	12.33	21.98	20.18	17.9	22.59	16.3	19.31	21.98	11.54	18.48	20.3	23.03	18.41	20.14	11.78	6.38	9.55	9.22	14.78	14.52	12.72	19.75	13.41	11.54	5.3	4.28	3.22		25	24	24	5	7	6	5	4	14	5	4
Peckoltia vittata	MZUSP 24122	6	68.11	28.77	24.61	4.32	9.36	5.6	13.67	3.28	12.61	20.13	19.24	16.55	21.76	14.43	17.78	21.99	9.77	17.77	19.4	23.57	17.57	17.75	11.03	6.41	10.65	8.28	15.89	12.93	11.08	18.16	11.62	11.13	4.39	3.23	3.01		25	24	24	5	7	6	5	4	14	4	4
Peckoltia vittata	MZUSP 34189	1	78.7	34.44	29.4	5.27	11.41	5.89	16.81	4.63	15.31	27.02	23.02	15.92	25.47	17.74	20.82	25.68	11.06	22.24	25.46	26.21	22.51	24.41	12.64	8.27	11.87	10.34	16.71	16.69	13.43	24.16	15.15	13.65	5.44	3.44	3.38		25	24	24	5	7	6	5	4	14	4	4
Peckoltia vittata	MZUSP 34190	1	86.36	37.73	31.84	5.81	11.6	7.04	18.17	4.3	15.54	26.9	25.67	18.95	29.8	20.12	25.25	29.37	13.07	23.22	25.64	30.51	22.31	24.26	13.93	8.42	12.82	10.21	18.37	17.43	14	23.69	13.42	15.48	6.53	3.91	4.64		25	24	25	5	7	6	5	4	14	5	4
Peckoltia vittata	MZUSP 34190	2	81.48	34.34	29.53		11.33	6.47	16.29	3.94	14.27	24.41	23.69	18.31	25.72	18.67	21.53	28.28	10.68	21.13	23.48	26.44	20.94	22.74	13.1	6.94	13.42	9.53	18.09	16.05	12.92	22.71	13.12	13.53	6.1	3.23	4.23		25	25	25	5	7	6	5	4	14	5	5
Peckoltia vittata	MZUSP 34190	3	75.67	33.2	27.86	5.19	10.8	6.06	15.62	3.45	13.61	23.45	21.66	17.61	26.04	16.75	20.22	25.66	11.01	19.41	22.34	25.02	19.99	20.97	11.39	7.05	10.25	10.06	14.56	13.6	11.71	20.33	13.44	12.35	4.33	3.92	4.14		25	23	25	5	7	6	5	4	14	5	5
Peckoltia vittata	MZUSP 34190	4	76.4	33.48	28.66	5.15	10.9	6.14	16.87	4.03	14.53	24.3	21.91	17.34	24.69	18.07	21.45	26.7	12.14	22.96	23.38		19.23	21.11	12.42	7.25	11.63	9.75	17.3	14.75	12.44	21.18	13.79	13.47	5.11	4.05	3.7		25	23	24	5	7	6	5	4	14	4	3
Peckoltia vittata	MZUSP 34190	5	64.23	27.99	23.78	4.75	8.77	5.64	12.75	3.04	11.55	20.19	18.04	14.75	21.27	13.77	17.21	20.44	8.54	16.37	18.19	23.86	16	16.88	10.84	6.19	10.31	7.96	14.66	11.4	10.12	16.52	10.46	9.15	2.91	2.95	2.8		25	24	24	5	7	6	5	4	14	5	5
Peckoltia vittata	MZUSP 3590	1	86.06	36.67	31.34	5.81	11.74	6.69	17.58	4.51	16.26	27.83	23.8	22.28	28.52	20.17	24.22	27.31	13.44	23.06	25.16	32.27	24.57	23.69	13.82	8.67	14.35	10.63	19.84	17.29	14.94	24.44	14.41	14.35	5.05	3.92	3.3		25	25	25	5	7	6	5	4	14	5	5
Peckoltia vittata	MZUSP 3590	2	80.46	36.62	30.35	6.23	11.82	6.14	17.7	4.3	15.4	27.09	24.23	19.8	27.97	19.16	22.65	25.31	13.02	23.11	24.81	28.55	21.5	20.41	12.56	7.32	11.04	10.57	16.48	16.11	13.87	23.51	14.39	12.97	4.63	4.01	3.93		24	23	24	5	7	6	5	4	14	5	5
Peckoltia vittata	MZUSP 3590	3	73.98	32.07	27.95	4.34	10.68	6.01	15.96	3.99	14.31	22.94	20.95	17.29	22.94	19.58	20.33	25.19	11.83	20.62	22.19	26.75	19.78	21.99	9.64	7.27	11.47	9.26	17.43	13.86	12.04	22.07	11.86	12.06	4.76	2.59	3.74		25	24	25	5	7	6	5	4	14	4	4
Peckoltia vittata	MZUSP 3590	4	79.63	35.14	30	5.31	10.82	5.46	16.45	3.85	14.19	24.31	22.25	19.61	24.12	18.56	19.84	27.44	11.67	20.37	22.85	25.37	22.11	21.57	15.81	8	10.95	9.25	16.06	15.43	13.43	23.72	13.98	12.48	4.66	3.94	3.53		25	23	25	5	7	6	5	4	14	4	4
Peckoltia vittata	MZUSP 3590	5	79.28	34.22	29.23	5.41	10.71	5.92	16.7	3.83	14.12	24.57	22.93	19.43	23.12	17.64	19.75	25.57	10.66	21.73	23.3	23.63	20.27	19.93	12.95	7.11	11.72	9.66	17.5	14.66	12.21	20.79	12.99	12	5.3	3.78	4.47		25	24	24	5	7	6	5	4	14	5	3
Peckoltia vittata	MZUSP 61995	1	102.37	41.87	34.22	8	13.22	6.94	20.33	5.37	16.83	32.29	27.96	23.66	28.87	24.35	24.61	33.51	13.97	26.27	29.45		26.65	29.7	16.03	9.1	15.48	13.28	21.99	21.6	17.89	30.2	16.36	15.15	6.66	3.72	3.64		26	26	25	5	7	6	5	4	14	4	5
Peckoltia vittata	MZUSP 75226	1	83.61	35.14	30.44		11.92	6.08	17.88	4.39	16.11	26.78	24.34	16.99	25.83	18.81	21.75	25.87	12.41	22.21	24.61	27.96	21.48	22.3	14.75	6.65	12.26	11.11	18.4	16.55	15.73	24.17	14.35	12.05	4.67	3.03	3.65		26	26	25	5	7	6	5	4	14	4	4
Peckoltia vittata	NMW 46360	1	98.48	42.2	35.18	7.12	12.56	6.86	21.92	5.7	14.33	30.2	28.33	20.66	27.29	22.71	26.98	33.51	17.31	27.06	29.42	33.47	24.55	26.28	16.5	9.93	16.04	14.27	23.63	22.63	19.28	23.34	14.63	14.45	5.61	3.91	3.62		24	22	24	5	7	6	5	4	14	4	4
Peckoltia vittata	NMW 46360	2	94.96	40.72	34.45	6.3	12.41	6.44	21.23	5.16	13.29	29.01	26.75	19.7	27.5	21.58	24.96	33.71	15.11	24.4	27.37		21.91	25.94	15.7	10.61	15.84	13.77	23.3	20.51	16.98	23.49	14.98	14.05	6.11	3.66	3.33		24	22	24	5	7	6	5	4	14	4	4
Peckoltia vittata	NMW 46360	3	99.78	43.67	36.36	8.12	13.06	7.75	21.92	5.63	13.84	31.12	28.18	20.95	27.65	22.95	26.09	34.23	16.85	26.28	28.5		22.75	28.31	15.96	10.69	18.41	14.56	24.06	20.77	17.39	23.83	14.21	14.46	5.63	3.68	3.55	4	24	22	24	5	7	6	5	4	14	5	4
Peckoltia vittata	NMW 46361	1	93.34	39.49	32.9	6.86	12.78	6.62	20.32	4.54	14.22	30.15	26.75	19.87	28.19	23.41	24.94	31.77	16.21	24.41	28.03	31.13	26.06	26.79	16.85	9.2	13.49	13.47	20.55	21.16	18.61	25.47	16.89	15.16	5.26	4.62	4.04		25	24	24	5	7	6	5	4	14	4	4
Peckoltia vittata	NMW 47228	1	91.11	38.23	31.66	8.65	11.83	6.53	18.58	4.19	11.87	27.27	25.32	22.48	26.22	22.12	22.66	30.66	11.55	23.48	26.22		22.66	24.92	14.81	7.32	14.98	10.77	20.47	16.99	15.53	23.78	14.24	15.84	4.85	3.72	4.31		25	24	25	5	7	6	5	4	14	5	4
Peckoltia vittata	NMW 47228	2	58.13	23.52	20.66	3.74	8.33	4.53	11.45	2.66	8.11	17.66	16.69	16.53	16.92	11.84	16.05	18.4	7.75	14.84	16.35		13.96	15.24	7.59	5.18	10.55	6.68	13.96	9.78	8.73	14.15	8.66	9.23	2.94	2.01	2.23		25	25	24	5	7	6	5	4	14	5	4
Peckoltia vittata	NMW 48055	1	51.29	24.09	20.48	3.68	7.86	3.76	11.27	3.5	8.16	14.62	14.37	12.65	16.89	11.73	13.65	16.2	6.78	14.37	15.89	17.49	11.31	13.3	6.18	5.82	10.42	6.41	12.54	8.94	8.47	15.54	9.66	8.1	3.07	3.16	2.68		24	24	24	5	7	6	5	4	14	4	4
Peckoltia vittata	NMW 48057	1	57.62	25.77	21.18	4.25	7.7	4.34	11.07	3.96	8.33	15.15	14.98	13.44	19.14	12.18	15.99	19.62	9.01	14.53	16.65	15.6	13.96	15.24	7.33	7.05	12.13	6.79	14.55	10.7	8.88	14.28	8.51	7.86	3.76	2.95	2.35		25	25	24	5	7	6	5	4	14	4	4
Peckoltia vittata	NMW 48058	1	83.44	35.69	28.85	7.75	11.51	5.38	17.19	4.87	12.9	26	21.54	18.56	27.01	19.6	22.95	29.41	12.47	21.91	24.8	29.74	22.44	23.18	12.35	11.31	17.52	12.64	23.02	18.52	15.79	22.22	13.27	10.38	4.97	3.04	2.58		24	24	25	5	7	6	5	4	14	5	4
Peckoltia vittata	NMW 48060	1	97.97	43.21	35.22	9.37	13.13	6.08	21.59	5.42	14.63	31.14	27.25	19.7	26.55	23.56	25.66	33.9	15.48	26	29.85	33.1	27.55	25.56	15.83	12.36	18.65	14.99	25.44	19.64	18.48	28.6	16.43	15.24	5.82	3.19	3.08		25	24	24	5	7	6	5	4	14	4	4
Peckoltia vittata	NMW 48061	1	95.12	40.44	33.03	7.6	11.6	6.05	19.47	4.44	11.92	27.84	25.77	21.03	32.57	23.39	25.17	31.96	14.72	24.3	27.86	34.35	23.99	24.08	15.18	8.77	15.16	13.15	21.94	20.21	15.74	24.74	14.38	14.26	6.85	3.68	3.99		25	24	25	5	7	6	5	4	14	4	4
Peckoltia vittata	NMW 48062	1	89.37	39.51	31.27	7.9	11.45	5.46	19.27	5.18	13.48	30.2	25.08	17.83	25.26	20.9	23.51	33.49	14.43	24.09	28.2	31.07	26.2	25.45	14.07	11.29	16.56	13.89	23.81	20.11	19.16	26.77	13.84	15.06	3.48	3.07	3.45		24	24	26	5	7	6	5	4	14	5	4
Peckoltia vittata	NMW 48063	1	71.57	32.41	26.1	6.71	9.62	5.81	14.9	3.38	9.97	22.43	21.32	16.92	24.48	17.03	19.36	25.35	10.21	17.9	20.51	25.69	17.74	18.38	9.97	8.54	13.55	9.73	18.57	12.05	11.54	19.28	13.35	12.72	4.8	3.47	2.92		24	23	24	5	7	6	5	4	14	5	4
Peckoltia vittata	UF100630	1	74.78	33.79	27.51	7.47	9.95	5.07	16.63	3.89	11.01	25.35	21.41	13.23	25.32	17.69	21.3	27.04	11.89	20.55	22.84	28.43	19.1	21.18	12.94	8.79	15.25	10.96	20.29	14.58	13.15	20.05	10.85	11.17	3.78	2.9	2.63		24	22	24	5	7	6	5	4	14	4	4
Peckoltia vittata	USNM 052593	1	99.23	42.6	34.31	8.6	12.59	6.88	20.88	5.25	14.22	30.17	28.71	19.92	28.07	24.38	22.14	35.53	15.73	25.71	27.42	35.7	22.54	26.15	16.13	12.04	17.56	13.91	24.09	21.96	19.55	24.33	15.26	15.16	5.39	3.57	3.17	4	24	22	24	5	7	6	5	4	14	4	4
Peckoltia vittata	USNM 052593	2	98.13	41.72	34.14	8.61	12.34	6.72	20.24	4.64	12.98	29.48	28.25	19.04	27.96	23.03	24.95	33.8	18.2	24.86	27.15	34.96	22.23	26.28	15.2	10.14	18.52	14.03	25.55	20.19	18.41	23.48	15.04	14.9	6.55	3.54	3.12		24	22	24	5	7	6	5	4	14	4	4
Peckoltia vittata	USNM 305824	1	101.21	44.05	35.92	8.21	12.4	5.88	22.35	6.58	15.76	26.87	27.01	22.54	31.19	23.85	26.33	35.3	17.16	25.23	29.88	34.4	23.67	27.94	13.32	12.29	20.72	12.23	24.29	17.68	15.11	27.02	15.86	15.11	4.93	4.71	4.14		25	24	25	5	7	6	5	4	14	4	4
Peckoltia vittata	USNM 305824	2	61.56	27.91	24.12	4.3	8.45	4.43	13.89	4.31	9.94	17.69	17.96	12.44	21.92	13.64	18.07	21.34	9.93	16.34	18.44	24.11	13.8	16.22	9.09	7.88	13.37	7.63	16.37	11.14	9.83	16.74	10.63	10.39	2.86	3.03	2.96		24	24	24	5	7	6	5	4	14	4	4
Peckoltia vittata	USNM 305824	3	58.52	26.82	21.99	4.93	8.17	4.25	12.72	3.86	8.76	16.64	15.93	12.58	21.17	13.58	17.07	20.35	10.36	15.67	18.26	20.64	13.65	14.24	7.41	7.93	14.02	6.83	15.56	10.6	9.47	15.81	10.23	9.55	3.11	2.36	2.76		24	24	24	5	7	6	5	4	14	4	4
Peckoltia vittata	USNM 305824	4	55.76	25.31	21.3	3.83	8	4.08	12.15	3.46	9.12	15.96	15.31	12.7	19.95	12.29	16.81	18.89	9.86	13.55	17.76		12.59	13.97	6.18	6.2	10.72	6.91	13.72	8.88	8.44	15.96	9.97	9.64	2.44	2.71	2		24	23	24	5	7	6	5	4	14	4	4
Peckoltia vittata	USNM 305824	5	52.33	24.7	20.35	4.27	7.69	4.01	11.19	3.54	8.48	14.91	13.97	12.67	17.26	11.3	14.49	16.55	8.74	14.62	17.13		11.42	13.06	6.05	6.44	9.72	6.16	11.65	9.09	8.35	14.11	9.29	7.72	2.23	2.37	2.24		23	23	24	5	7	6	5	4	14	4	4
Peckoltia vittata	USNM 305824	6	44.47	20.96	17.58	3.19	6.76	3.37	9.22	3.19	6.86	12.83	12.61	11.25	15.31	10.62	12.26	14.83	6.03	12.17	13.85	14.88	9.05	10.97	5.02	5.9	9.58	5.08	10.51	7.9	6.74	11.75	8.13	7.29	2.07	2.11	2.3		23	23	23	5	7	6	5	4	14	4	4
Peckoltia vittata	USNM 305824	7	39.15	18.54	15.87	2.74	6.14	3.04	8.94	2.54	6.14	11.48	11.01	9.58	12.74	7.74	11.82	13.35	4.99	10.45	11.64		9.05	9.56	4.78	5.48	8.61	4.31	9.77	7.64	6.26	10.34	7.58	6.82	1.54	2.65	2.47		23	24	23	5	7	6	5	4	14	4	4
Peckoltia vittata	USNM 305824	8	35.41	16.26	14.24	2	5.83	2.58	7.59	2.27	5.35	9.64	10.34	8.37	11.87	8.25	10.2	12.16	4.15	9.16	10.85	11.86	6.68	8.94	3.49	4.96	7.44	3.59	8.94	5.45	4.94	8.5	6.16	5.39	1.66				25	25	24	5	7	6	5	4	14	4	4
Peckoltia vittata	USNM 305824	9	34.09	16.49	14.67	1.95	6.01	2.86	8.06	2.55	5.42	9.56	10.35	8.46	10.91	8.37	9.47	11.99	4.3	9.65	10.89		7.18	8.44	3.23	5.11	7.66	3.92	9.78	5.86	5.09	8.67	6.14	6.05	1.6				25	24	25	5	7	6	5	4	14	4	4
Peckoltia vittata	USNM 305824	10	34.26	16.07	13.76	2.32	5.37	2.94	7.23	2.77	5.44	8.86	9.98	7.9	11.16	7.27	9.66	10.73	4.24	9.72	10.61	11.4	7.23	8.01	3.84	4.98	8.51	4.08	9.6	5.01	5.12	8.98	6.16	5.46	1.46				24	23	23	5	7	6	5	4	14	4	4
Peckoltia vittata/kuhlmanni	MNRJ 2044	1	90.75	36.49	31.2	5.21	11.07	6.77	18.17	4.11	13.77	25.68	26.16	20.48	29.52	21.48	22.4	30.01	14.39	21.27	23.46	30.9	20.45	24.48	14.62	6.88	15.15	10.98	20.25	16.67	15.14	21.67	13.57	14.66	6.68	4.38	4.55		24	24	24	5	7	6	5	4	14	5	5
Peckoltia vittata/kuhlmanni	MNRJ 2044	2	87.07	33.83	29.2	5.35	9.93	7.39	17.13	3.4	12.78	24.05	23.63	19.44	27.62	20.44	22.33	28.58	13.58	19.85	22.59	32.85	20.23	23.89	14.15	8.16	15.13	10.43	20.17	15.94	13.71	22.75	13.35	13.61	4.38	4.01	3.5		26	25	25	5	7	6	5	4	14	5	5
Peckoltia wernekei	AUM 39248	1	63.18	26.78	22.44	4.04	8.05	5.27	12.82	2.66	10.82	17.73	17.89	13.12	20.94	12.73	17.74	24.04	10.26	14.69	16.61	19.67	11.87	17.06	7.59	7.15	11.63	8.31	14.83	12.82	9.66	13.32	9.61	10.31	4.35	2.85	2.57		24	22	24	5	7	6	5	4	14	4	4
Peckoltia wernekei	AUM 39313	1	87.32	34.77	28.41	6.92	10.19	6.3	16.9	3.44	12.92	22.38	24.86	19.21	27.3	17.57	23.56	31.8	16.07	18.75	20.8	29.06	18.81	25.04	14.17	9.03	14.55	9.81	19.45	18.33	12.61	19.12	12.71	13.07	5.56	3.93	4.38		24	22	24	5	7	6	5	4	14	4	3
Peckoltia wernekei	AUM 39313	2	80.18	33.08	27.53	5.77	9.78	6.07	15.99	3.11	12.47	21.75	21.62	16.21	25.58	16.44	22.17	30.02	13.84	18.3	20.16	27.41	18.18	23.22	11.77	8.65	13.67	9.77	17.75	16.32	11.52	17.85	11.64	12.07	5.2	3.29	3.43		24	22	24	5	7	6	5	4	14	4	4
Peckoltia wernekei	AUM 39313	3	78.65	31.04	26.7	4.53	9.2	5.71	15.2	3.06	11.49	21.59	21.28	17.11	24.38	15.77	20.06	27.13	12.56	17.85	19.02	24.46	17.23	23.21	13.65	7.78	12.54	9.75	17.09	15.43	11.16	17.12	10.71	11.44	4.91	3.19	3.42		24	22	24	5	7	6	5	4	14	4	4
Peckoltia wernekei	AUM 39313	4	73.49	30.52	25.37	4.8	8.21	5.44	14.39	2.96	11.85	20.56	20.36	16.62	22.98	14.36	19.86	25.61	11.81	17.13	18.94	25.19	17.14	20.75	11.72	7.87	12.99	8.78	17.04	14.66	10.92	16.43	10.86	11.12	5.21	3.05	3.23	24	24	22	24	5	7	6	5	4	14	4	4
Peckoltia wernekei	AUM 39313	5	72.31	30.08	25.21	4.46	9.4	5.51	14.23	3.09	11.61	20.28	19.83	16.48	23.82	14.62	19.02	25.24	11.66	16.82	18.8	24.37	16.55	21.7	10.64	7.82	13.23	8.69	16.71	14.31	10.85	16.34	10.92	11.06	4.8	3.17	3.39		24	22	24	5	7	6	5	4	14	4	4
Peckoltia wernekei	AUM 39313	6	72.44	30.38	25.32	5.04	9.17	5.52	14.41	2.85	12.56	21.07	19.55	16.42	24.36	15.59	20.22	25.07	11.38	16.47	19.08	24.9	16.05	22.09	11.87	7.56	13.31	8.51	17.14	14.87	11.05	16.65	10.54	11.25	5.35	3.1	3.26		24	22	24	5	7	6	5	4	14	4	4
Peckoltia wernekei	AUM 39313	7	73.99	30.04	25.41	3.95	9.23	5.37	14.6	2.69	11.45	20.48	20.32	17.1	23.45	15.15	19.59	26.58	11.46	16.89	19.67	24.63	15.84	21.02	10.99	8.66	12.82	8.58	17.02	15.18	10.48	16.34	10.83	10.86	5.66	3.19	3.29		24	22	24	5	7	6	5	4	14	4	4
Peckoltia wernekei	AUM 39313	8	72.36	30.32	25	4.89	9.02	5.31	14.52	2.78	11.9	20.25	19.93	16.59	23.92	14.65	20.07	25.88	11.47	16.3	18.66	24.25	15.58	20.89	10.47	7.88	12.7	8.61	16.85	15.16	10.6	16.21	10.48	11.03	4.5	3.02	3.19		24	22	24	5	7	6	5	4	14	4	4
Peckoltia wernekei	AUM 39313	9	68.9	29.35	24.71	4.36	9.11	5.43	14.02	2.84	11.3	19.94	18.39	15.28	22.66	13.94	19.96	22.38	10.94	16.4	18.05	21.96	14.85	20.03	10.52	7.24	12.76	8.15	15.99	13.31	10.35	14.94	9.38	10.21	4.29	2.77	2.91		24	22	24	5	7	6	5	4	14	4	4
Peckoltia wernekei	AUM 39313	10	69.79	30.81	25.81	4.64	9.53	5.58	13.99	2.72	11.96	20.21	18.62	16.6	22.45	14.15	20.25	23.56	11.5	16.99	19.6	22.72	14.43	21.55	11.5	7.18	11.88	8.1	15.97	14.67	10.25	16.21	10.31	9.95	3.32	2.83	2.96		24	22	24	5	7	6	5	4	14	4	4
Peckoltia wernekei	AUM 39313	11	69.35	29.98	24.74	5.18	8.91	5.44	14.18	2.82	11.72	20.37	18.37	16.3	24.03	14.07	18.82	23.49	11.56	16.39	18.92		14.82	20.11	11.28	8.31	12.27	7.92	15.91	14.57	10.04	14.86	9.85	10.1	4.62	2.68	2.88		24	22	24	5	7	6	5	4	14	4	4
Peckoltia wernekei	AUM 39313	13	68.48	29.11	23.5	5.04	9.08	5.26	13.04	2.42	11.39	19.26	17.91	14.59	21.94	14.04	19.08	23.31	11.11	16.29	18.54	23.29	14.58	19.88	10.33	7.09	11.51	8.2	15.47	14.27	10.16	15.6	10.05	10.54	4.5	2.33	2.67		24	22	24	5	7	6	5	4	14	4	4
Peckoltia wernekei	AUM 39313	14	65.15	28.22	23.6	4.08	8.54	5.2	13.08	2.59	11.08	19.13	18.05	14.15	20.66	12.53	17.26	23.41	10.52	15.27	17.83	18.75	14.37	18.44	9.15	7.1	11.15	7.67	15.25	13.25	9.8	14.4	9.91	10.41	3.87	2.14	2.53		24	22	24	5	7	6	5	4	14	4	4
Peckoltia wernekei	AUM 39313	15	64.12	26.55	22.98	3.18	9.49	5.19	12.99	2.46	11.21	18.57	17.27	14.45	20.81	12.82	17.35	22.94	10.38	15.3	17.36	22.9	13.89	17.38	9.2	7.49	10.96	6.99	15.82	12.87	9.31	14.14	9.95	8.35	3.91	2.03	2.32		24	22	24	5	7	6	5	4	14	4	4
Peckoltia wernekei	AUM 39313	17	60.33	27.24	22.65	4.26	8.08	5.04	12.28	2.38	10.96	18.27	16.13	13.87	19.59	12.26	16.54	21.16	8.9	15.73	17.79	19	13.65	17.37	8.79	5.94	11.65	7.2	14.84	12.04	9	13.53	9.19	9.75	3.9	2.09	2.35		24	22	24	5	7	6	5	4	14	4	4
Peckoltia wernekei	AUM 39313	18	61.69	26.98	22.48	3.97	8.58	5.26	12.2	2.48	10.69	18.91	17.6	14.46	20.21	12.88	15.7	21.32	9.24	15.29	17.22	20.16	13.32	17.54	9.41	6.54	10.28	7.27	14.15	12.1	9.34	13.84	8.99	9.49	3.92	1.96	2.23		24	22	24	5	7	6	5	4	14	4	4
Peckoltia wernekei	AUM 39313	22	52.57	22.65	18.84	3.3	7.11	4.46	10.46	2.16	9.34	15.09	14.5	12.3	16.85	10.33	15.08	17.62	8.5	13.43	15.13	17.3	12.45	15.49	8.07	5.74	8.66	6.4	13.03	10.75	8.29	11.08	8.21	8.24	2.37	1.48	1.74		24	22	24	5	7	6	5	4	14	4	4
Peckoltia wernekei	AUM 39313	25	71.45	30.84	25.66	4.82	9.21	5.47	14.82	2.97	12.39	21.7	20.2	16.8	21.49	14.73	18.07	25.18	10.77	17.28	19.8	22.57	17.06	20.92	11.41	6.79	11.82	8.09	15.4	14.62	11.55	16.78	11.84	11.24	3.97	3.01	3.57		24	22	24	5	7	6	5	4	14	4	4
Peckoltia wernekei	AUM 39313	26	68.46	28.98	24.74	4.28	8.88	5.08	13.62	2.92	11.51	19.11	17.86	16.55	20.24	14.23	17.32	23.31	13.08	16.9	19.16	20.79	15.65	19.13	10.01	7.17	11.27	7.67	15.22	13.51	10.17	15.75	10.28	11.08	4.05	2.85	3.15		24	22	24	5	7	6	5	4	14	4	4
Peckoltia wernekei	AUM 39313	27	56.76	24.46	20.58	3.42	7.91	4.67	11.31	2.26	9.59	16.32	15.23	13.73	16.89	10.96	14.71	19.48	8.57	14.15	16.05	17.69	13.84	16.47	8.68	6.12	8.71	6.25	12.54	11.41	8.81	11.8	8.19	8.97	2.86	2.19	2.44		24	22	24	5	7	6	5	4	14	4	4
Peckoltia wernekei	AUM 39313	28	58.24	25.03	21.33	3.5	7.84	4.89	11.97	2.39	9.84	17.37	15.98	14.45	19.04	11.73	16.49	20.11	9.17	15.67	17.32	20.49	14.43	17.14	8.59	6.64	9.05	6.56	13	11.44	9.51	13.4	9.04	9.51	3.05	2.46	2.91		24	22	24	5	7	6	5	4	14	4	4
[truncated: 77 more columns]
